# Supplementary material
Source: publisher site journal article supplement (https://www.dovepress.com/article/438686)
Supplement: Supplementary file 1 [file get_supplementary_file.php]

Supplementary

Table1 GEO dataset information summary

|                   |                               |
|-------------------|-------------------------------|
| GSE76925          |                               |
| Organism          | Homo sapiens                  |
| Experiment type   | Expression profiling by array |
| Platforms         | GPL10558                      |
| Diagnosis(number) |                               |
| Normal            | 40                            |
| COPD              | 111                           |
| Age(number)       |                               |
| <50               | 4                             |
| 50-70             | 123                           |
| >70               | 24                            |
| Gender(number)    |                               |
| Female            | 84                            |

|                          |     |
|--------------------------|-----|
| Male                     | 67  |
| <b>Packyears(number)</b> |     |
| <60                      | 93  |
| 60-100                   | 49  |
| >100                     | 9   |
| <b>Bmi(number)</b>       |     |
| <18.5                    | 6   |
| 18.5-24.9                | 57  |
| >24.9                    | 86  |
| <b>NA</b>                | 2   |
| <b>Total</b>             | 151 |

---

COPD: chronic obstructive pulmonary disease

NA: not available

Supplementary

Table2    GEO dataset information summary

|                        |                               |
|------------------------|-------------------------------|
| GSE8545                |                               |
| Organism               | Homo sapiens                  |
| Experiment type        | Expression profiling by array |
| Platforms              | GPL570                        |
| Diagnosis(number)      |                               |
| non-smoker             | 18                            |
| Smoker without<br>COPD | 18                            |
| Smoker with COPD       | 18                            |
| Age(number)            |                               |
| <50                    | 39                            |
| 50-70                  | 15                            |
| >70                    | 0                             |

**Gender(number)**

|        |    |
|--------|----|
| Female | 13 |
|--------|----|

|      |    |
|------|----|
| Male | 41 |
|------|----|

**Packyears(number)**

|     |    |
|-----|----|
| <60 | 50 |
|-----|----|

|        |   |
|--------|---|
| 60-100 | 4 |
|--------|---|

|      |   |
|------|---|
| >100 | 0 |
|------|---|

|              |           |
|--------------|-----------|
| <b>Total</b> | <b>54</b> |
|--------------|-----------|

---

Supplementary

Table3    GEO dataset information summary

|                        |                               |
|------------------------|-------------------------------|
| GSE5058                |                               |
| Organism               | Homo sapiens                  |
| Experiment type        | Expression profiling by array |
| Platforms              | GPL570                        |
| Diagnosis(number)      |                               |
| non-smoker             | 12                            |
| Smoker without<br>COPD | 12                            |
| early COPD             | 9                             |
| COPD                   | 9                             |
| Age(number)            |                               |
| <50                    | 27                            |
| 50-70                  | 12                            |

|     |   |
|-----|---|
| >70 | 0 |
|-----|---|

**Gender(number)**

|        |   |
|--------|---|
| Female | 9 |
|--------|---|

|      |    |
|------|----|
| Male | 30 |
|------|----|

**Packyears(number)**

|     |    |
|-----|----|
| <60 | 36 |
|-----|----|

|        |   |
|--------|---|
| 60-100 | 3 |
|--------|---|

|      |  |
|------|--|
| >100 |  |
|------|--|

|              |    |
|--------------|----|
| <b>Total</b> | 39 |
|--------------|----|

---

Supplementary

Table4    Human Clinical baseline data

|                        | COPD  | Normal control |
|------------------------|-------|----------------|
| Organism               | Blood | Blood          |
| Diagnosis(number)      |       |                |
| non-smoker             | 16    | 17             |
| Smoker without<br>COPD |       | 3              |
| Smoker with COPD       | 16    |                |
| Age(number)            |       |                |
| <50                    |       | 3              |
| 50~                    | 2     | 9              |
| 60~                    | 4     | 3              |
| 70~                    | 16    | 3              |
| >80                    | 10    | 2              |

|                          |    |    |
|--------------------------|----|----|
| <b>Gender(number)</b>    |    |    |
| Female                   | 4  | 9  |
| Male                     | 28 | 11 |
| <b>Packyears(number)</b> |    |    |
| <b>No smoking</b>        | 16 | 18 |
| <60                      |    |    |
| 60-100                   | 1  |    |
| 100~1000                 | 11 | 1  |
| >1000                    | 4  | 1  |
| <b>Total</b>             | 32 | 20 |

---

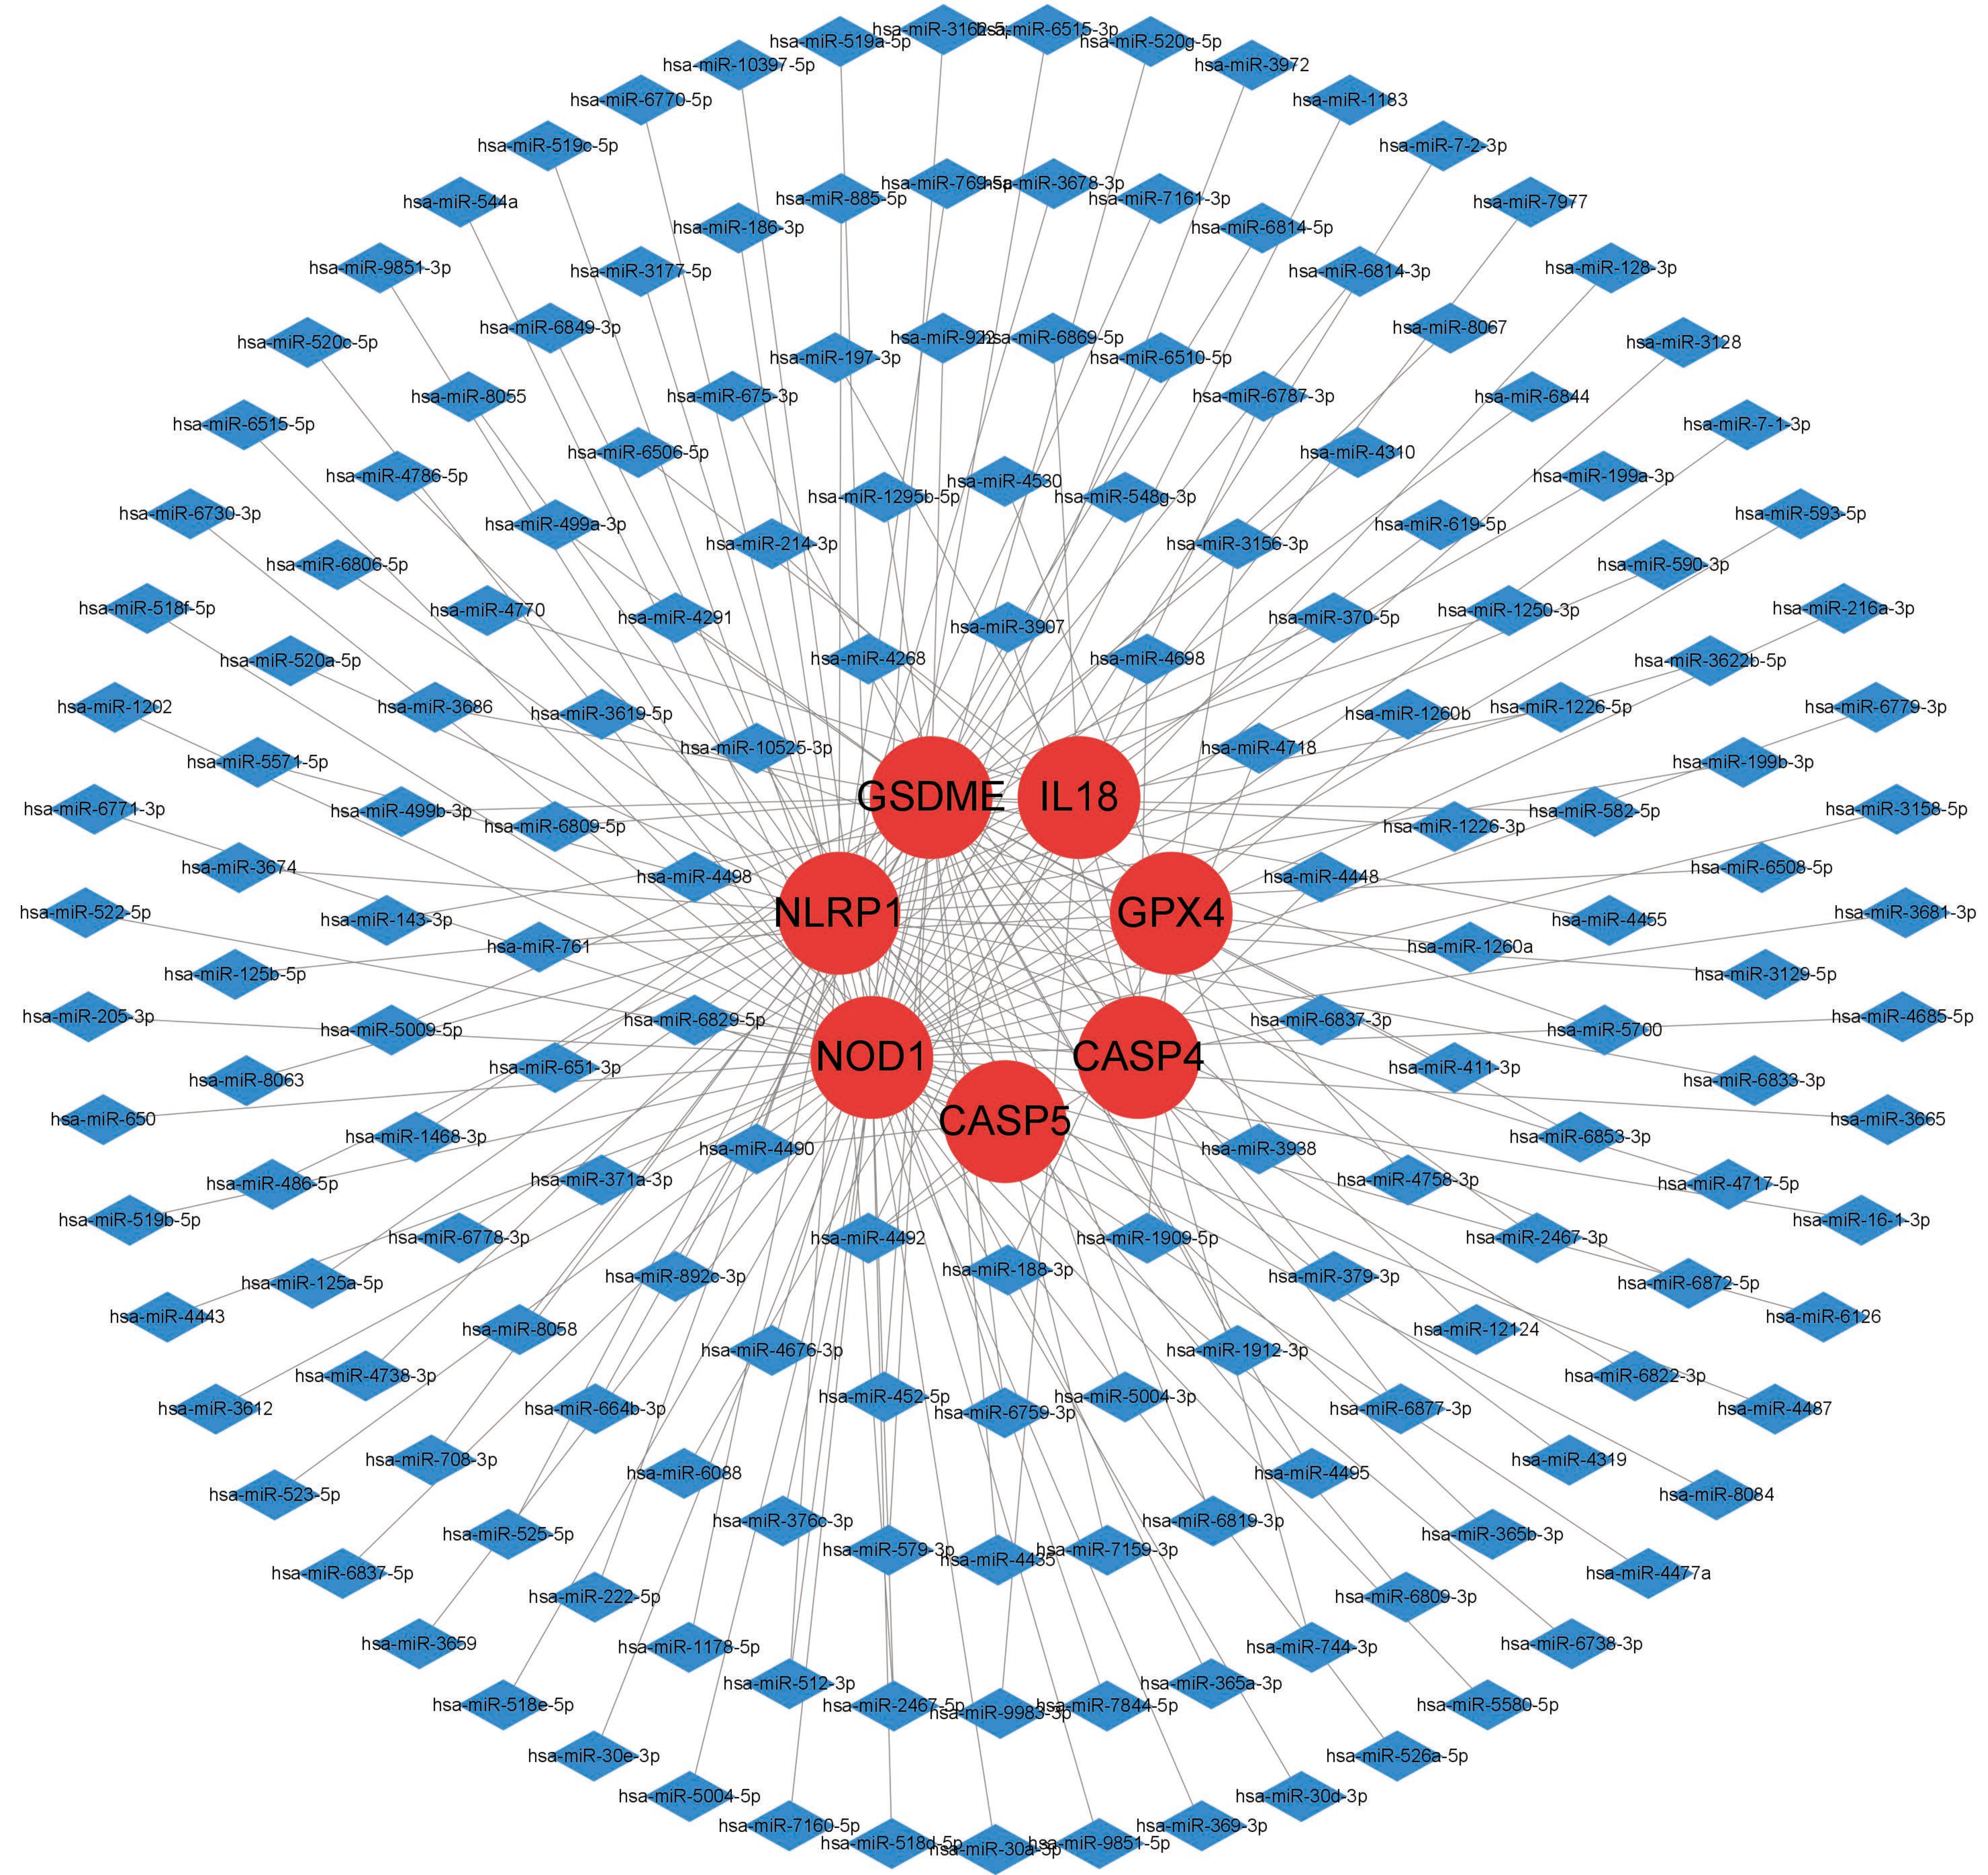

## Supplementary

Figure1 Analysis of miRNA-pyroptosis diagnostic marker interaction network

A

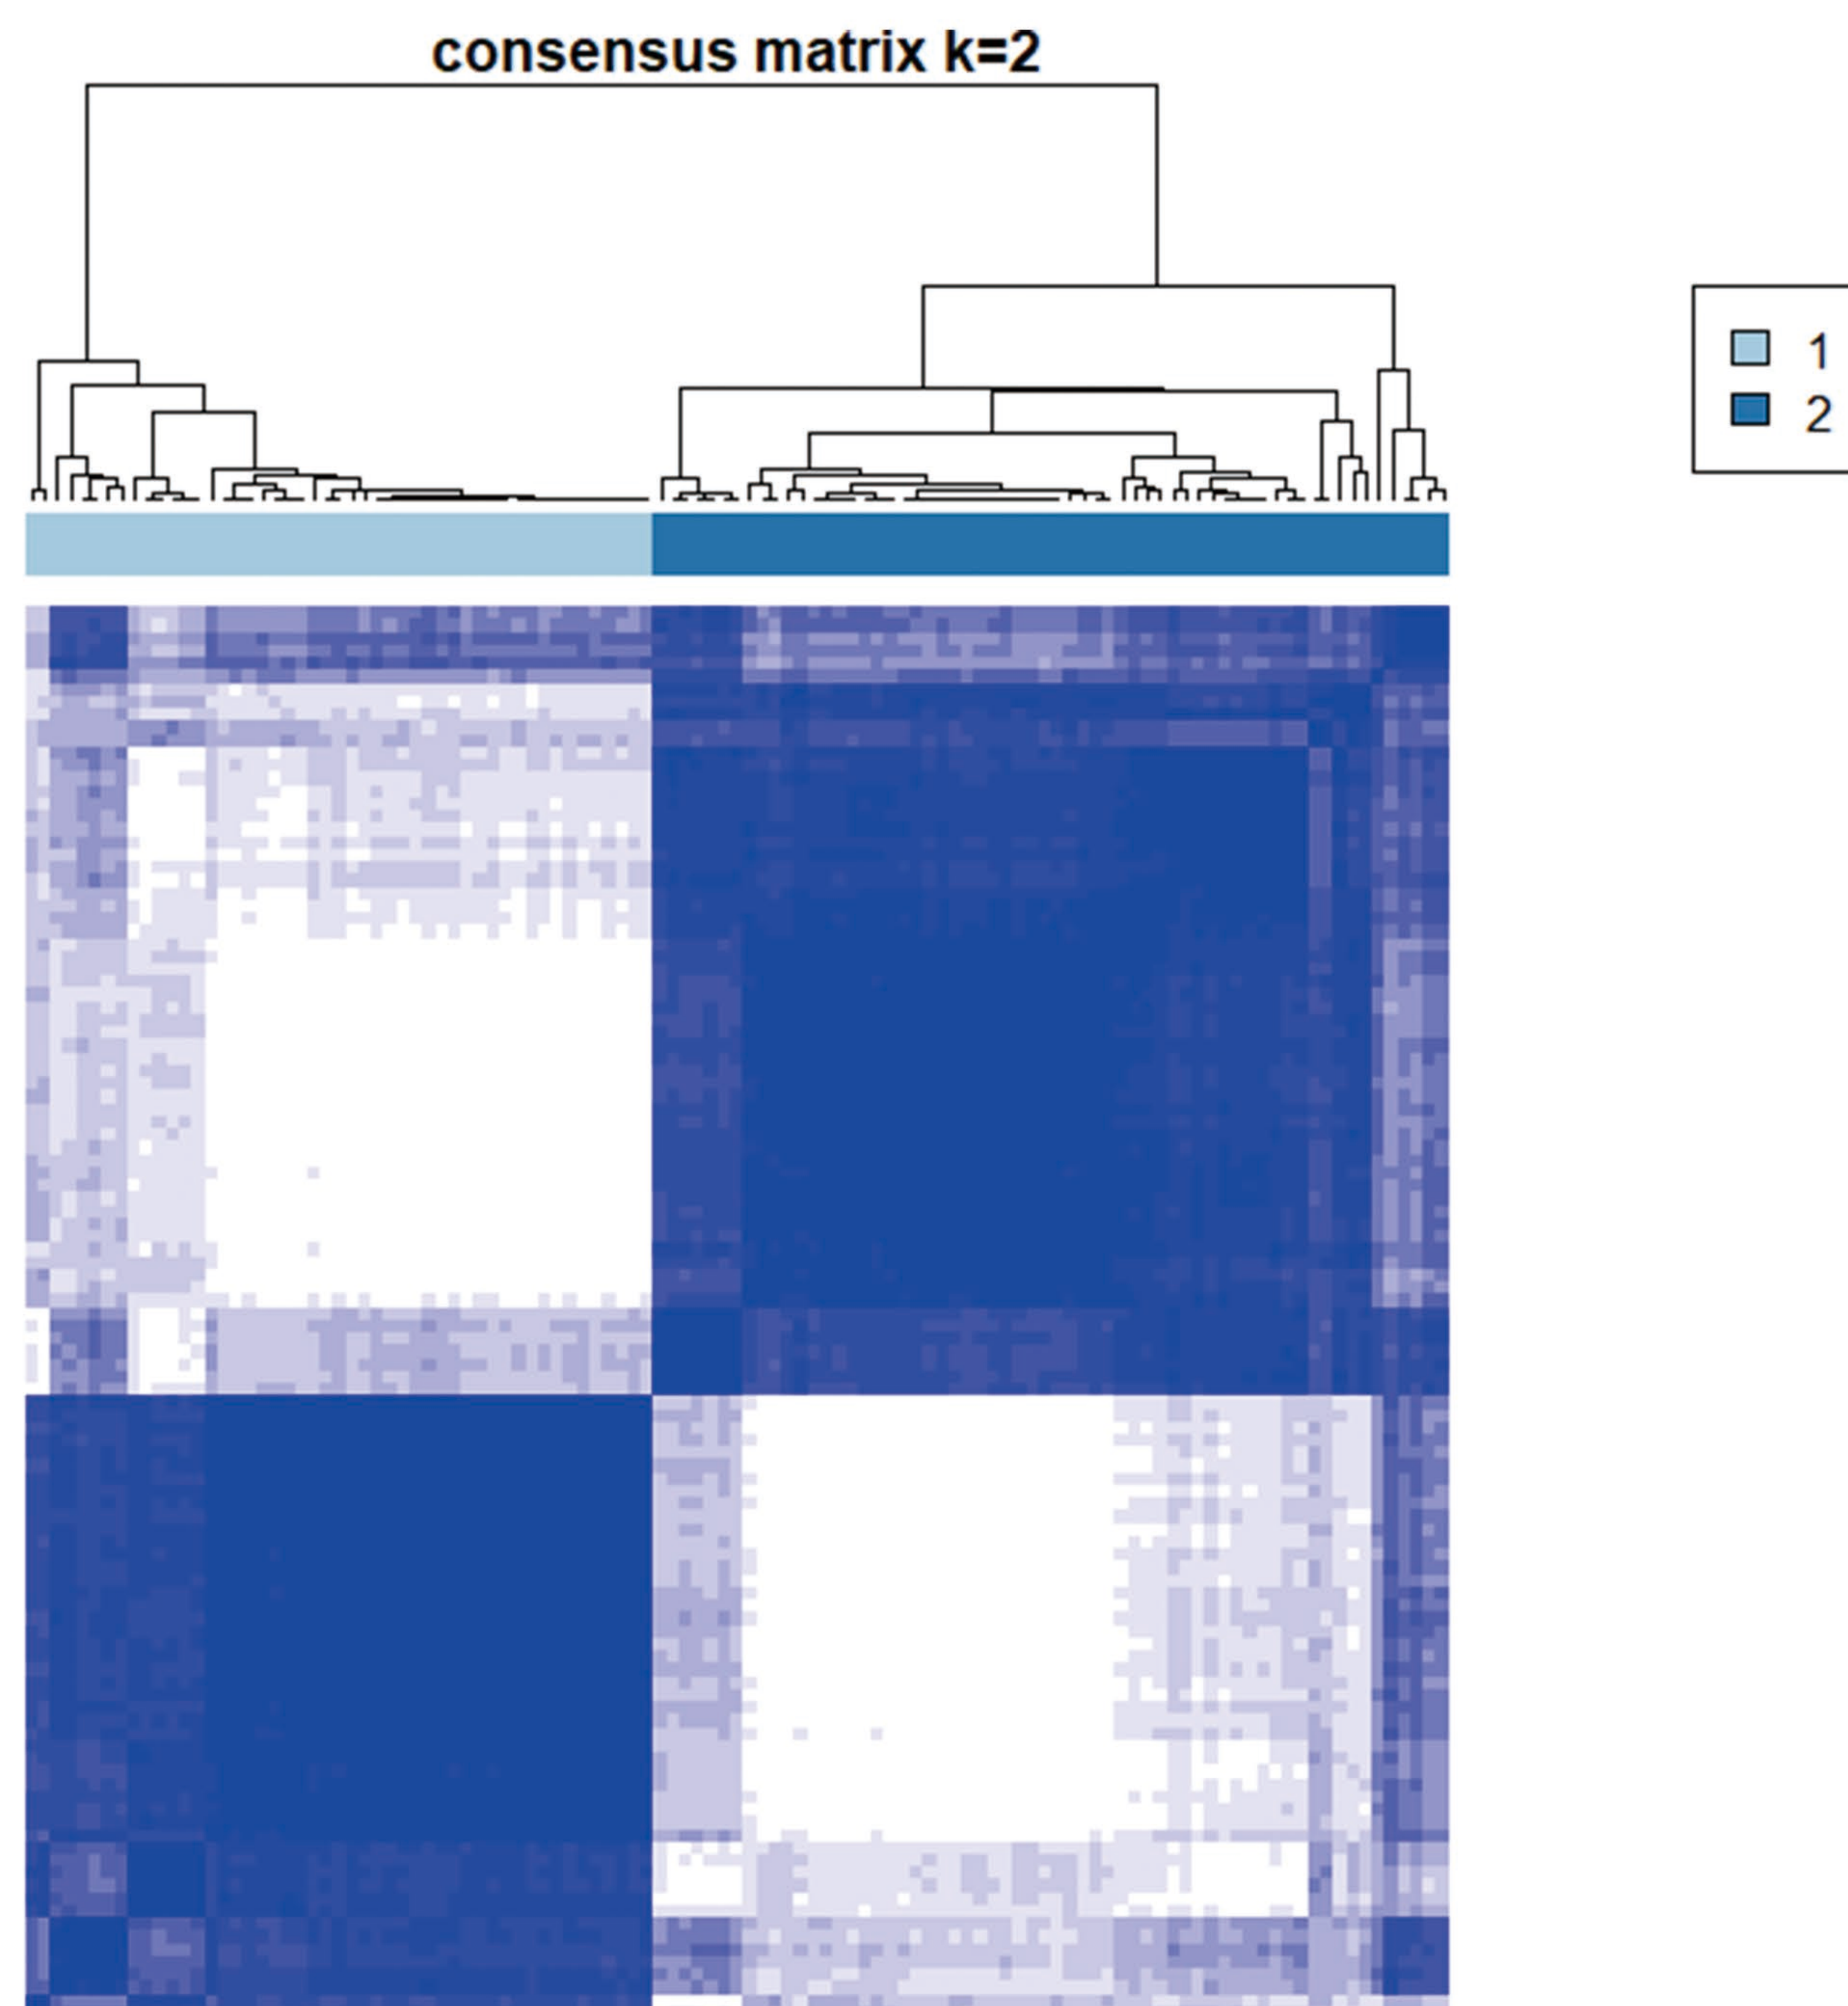

B

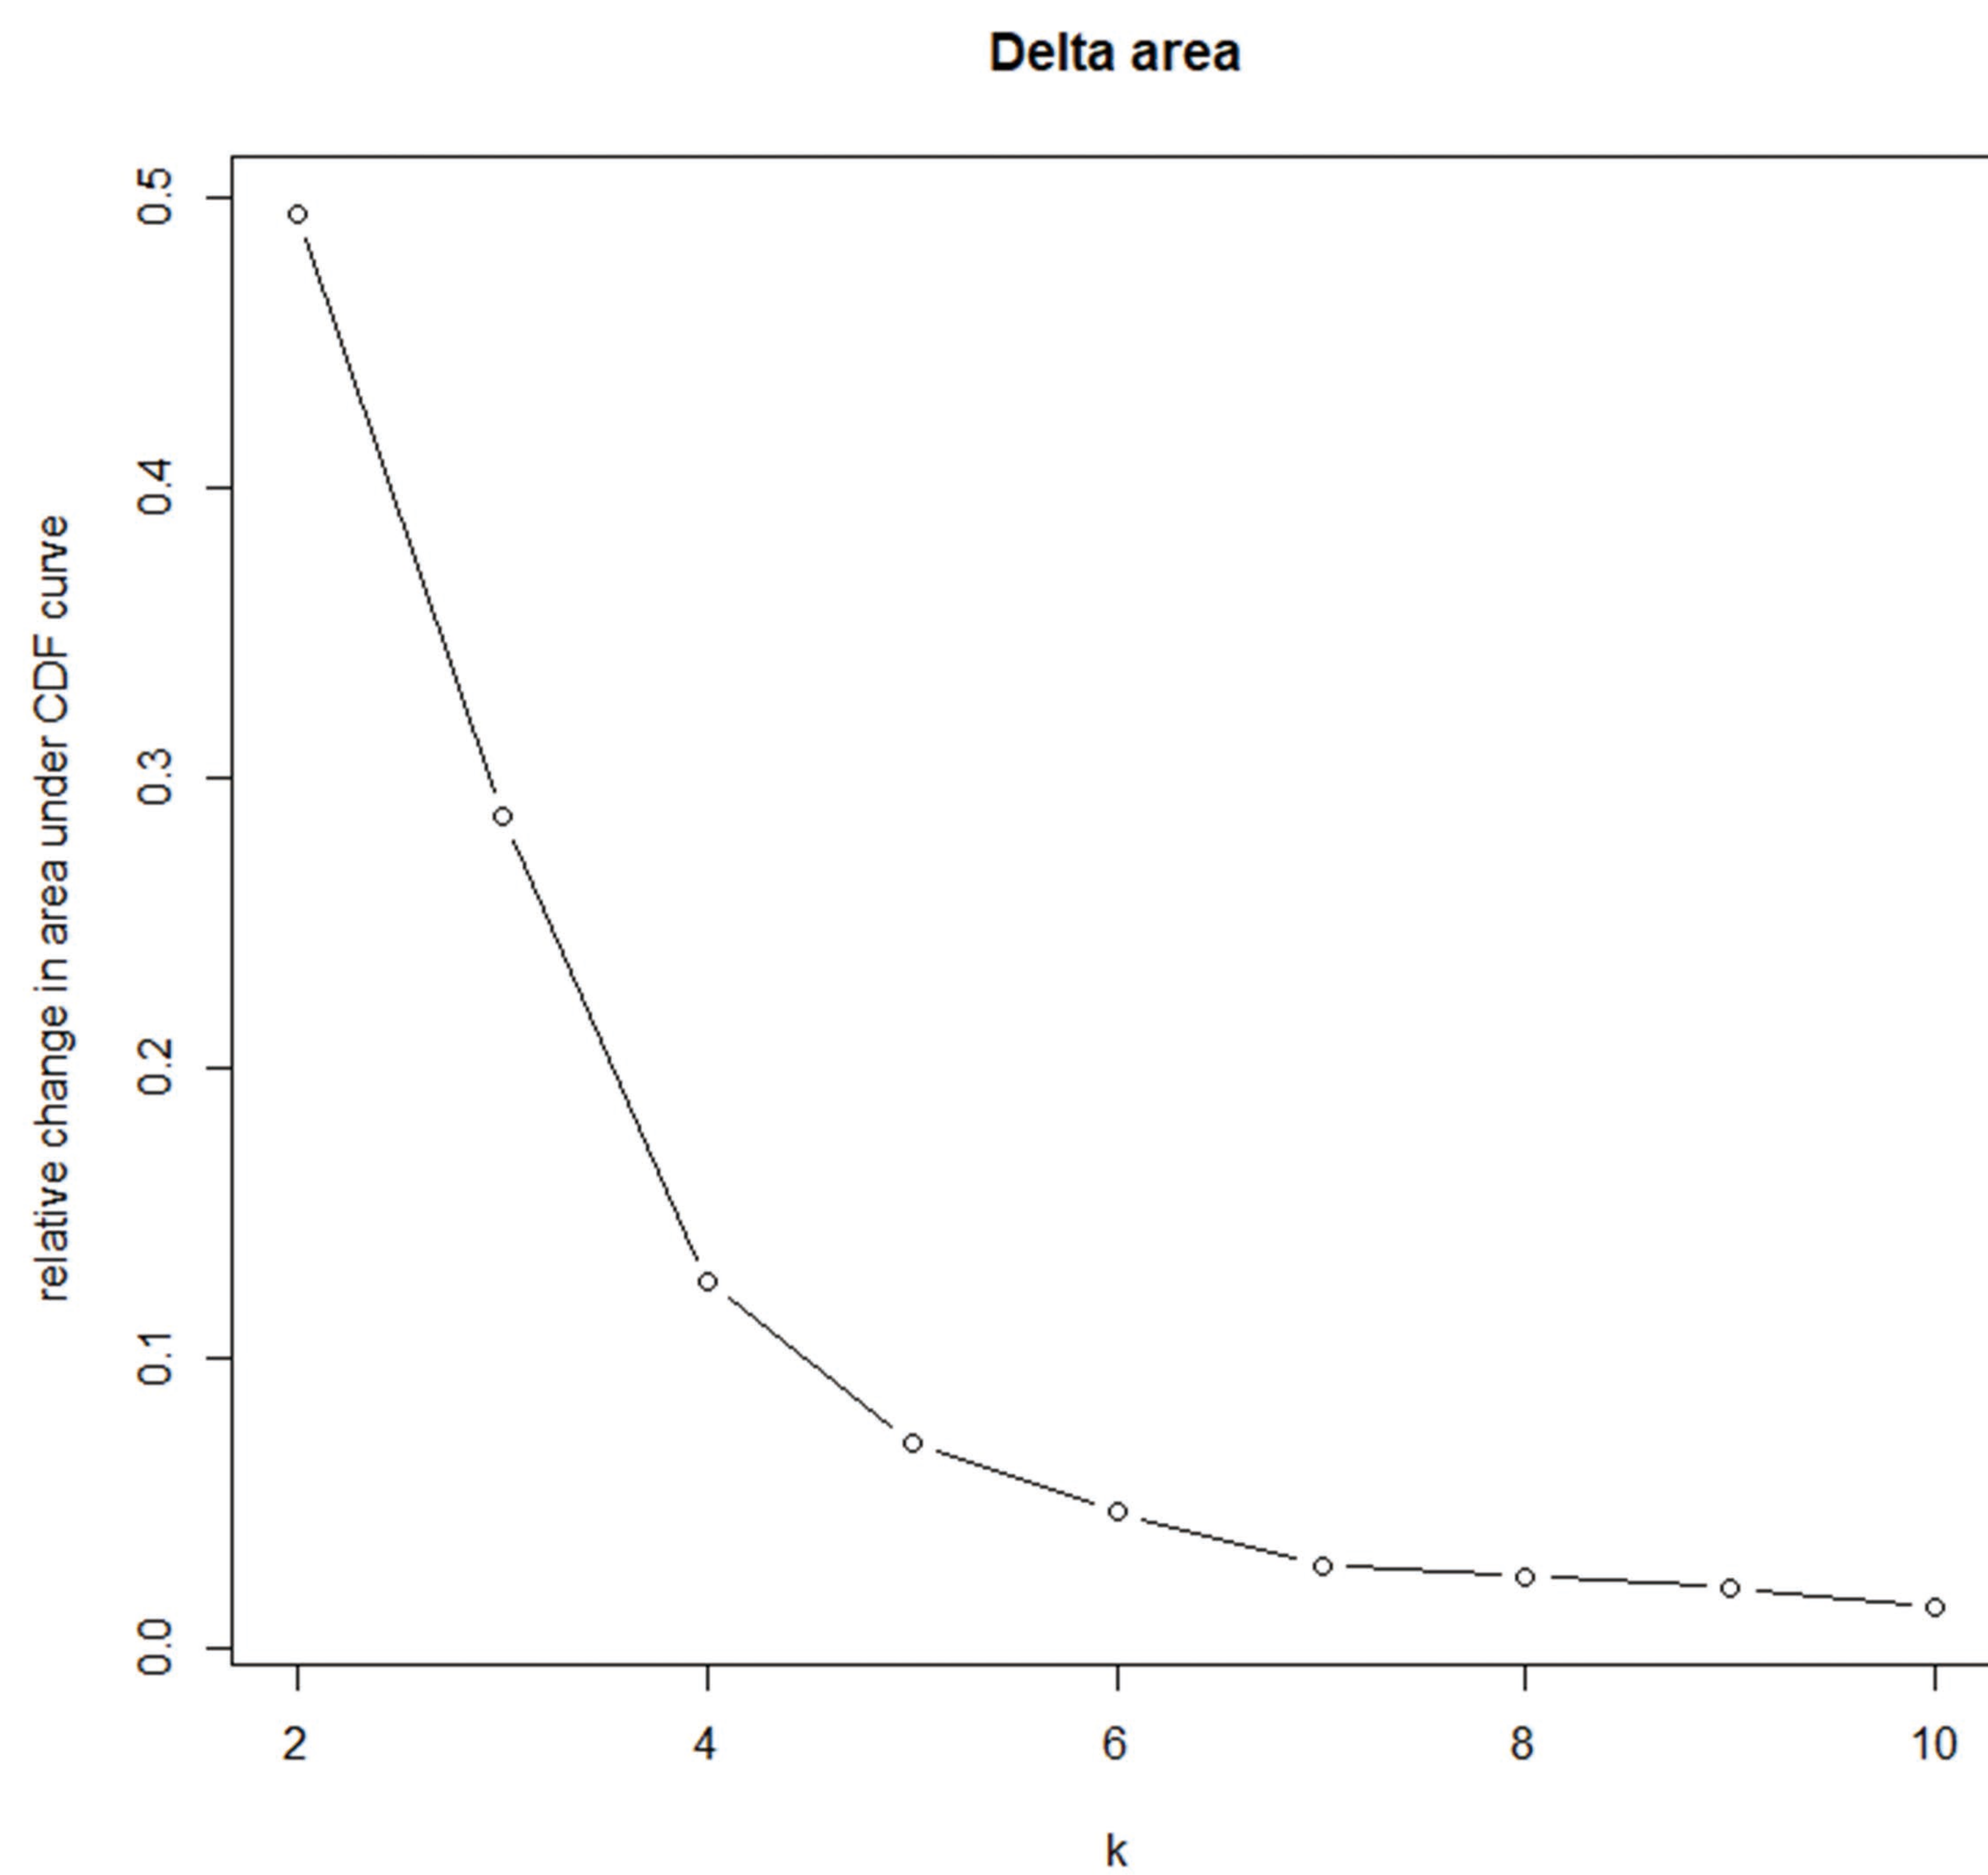

C

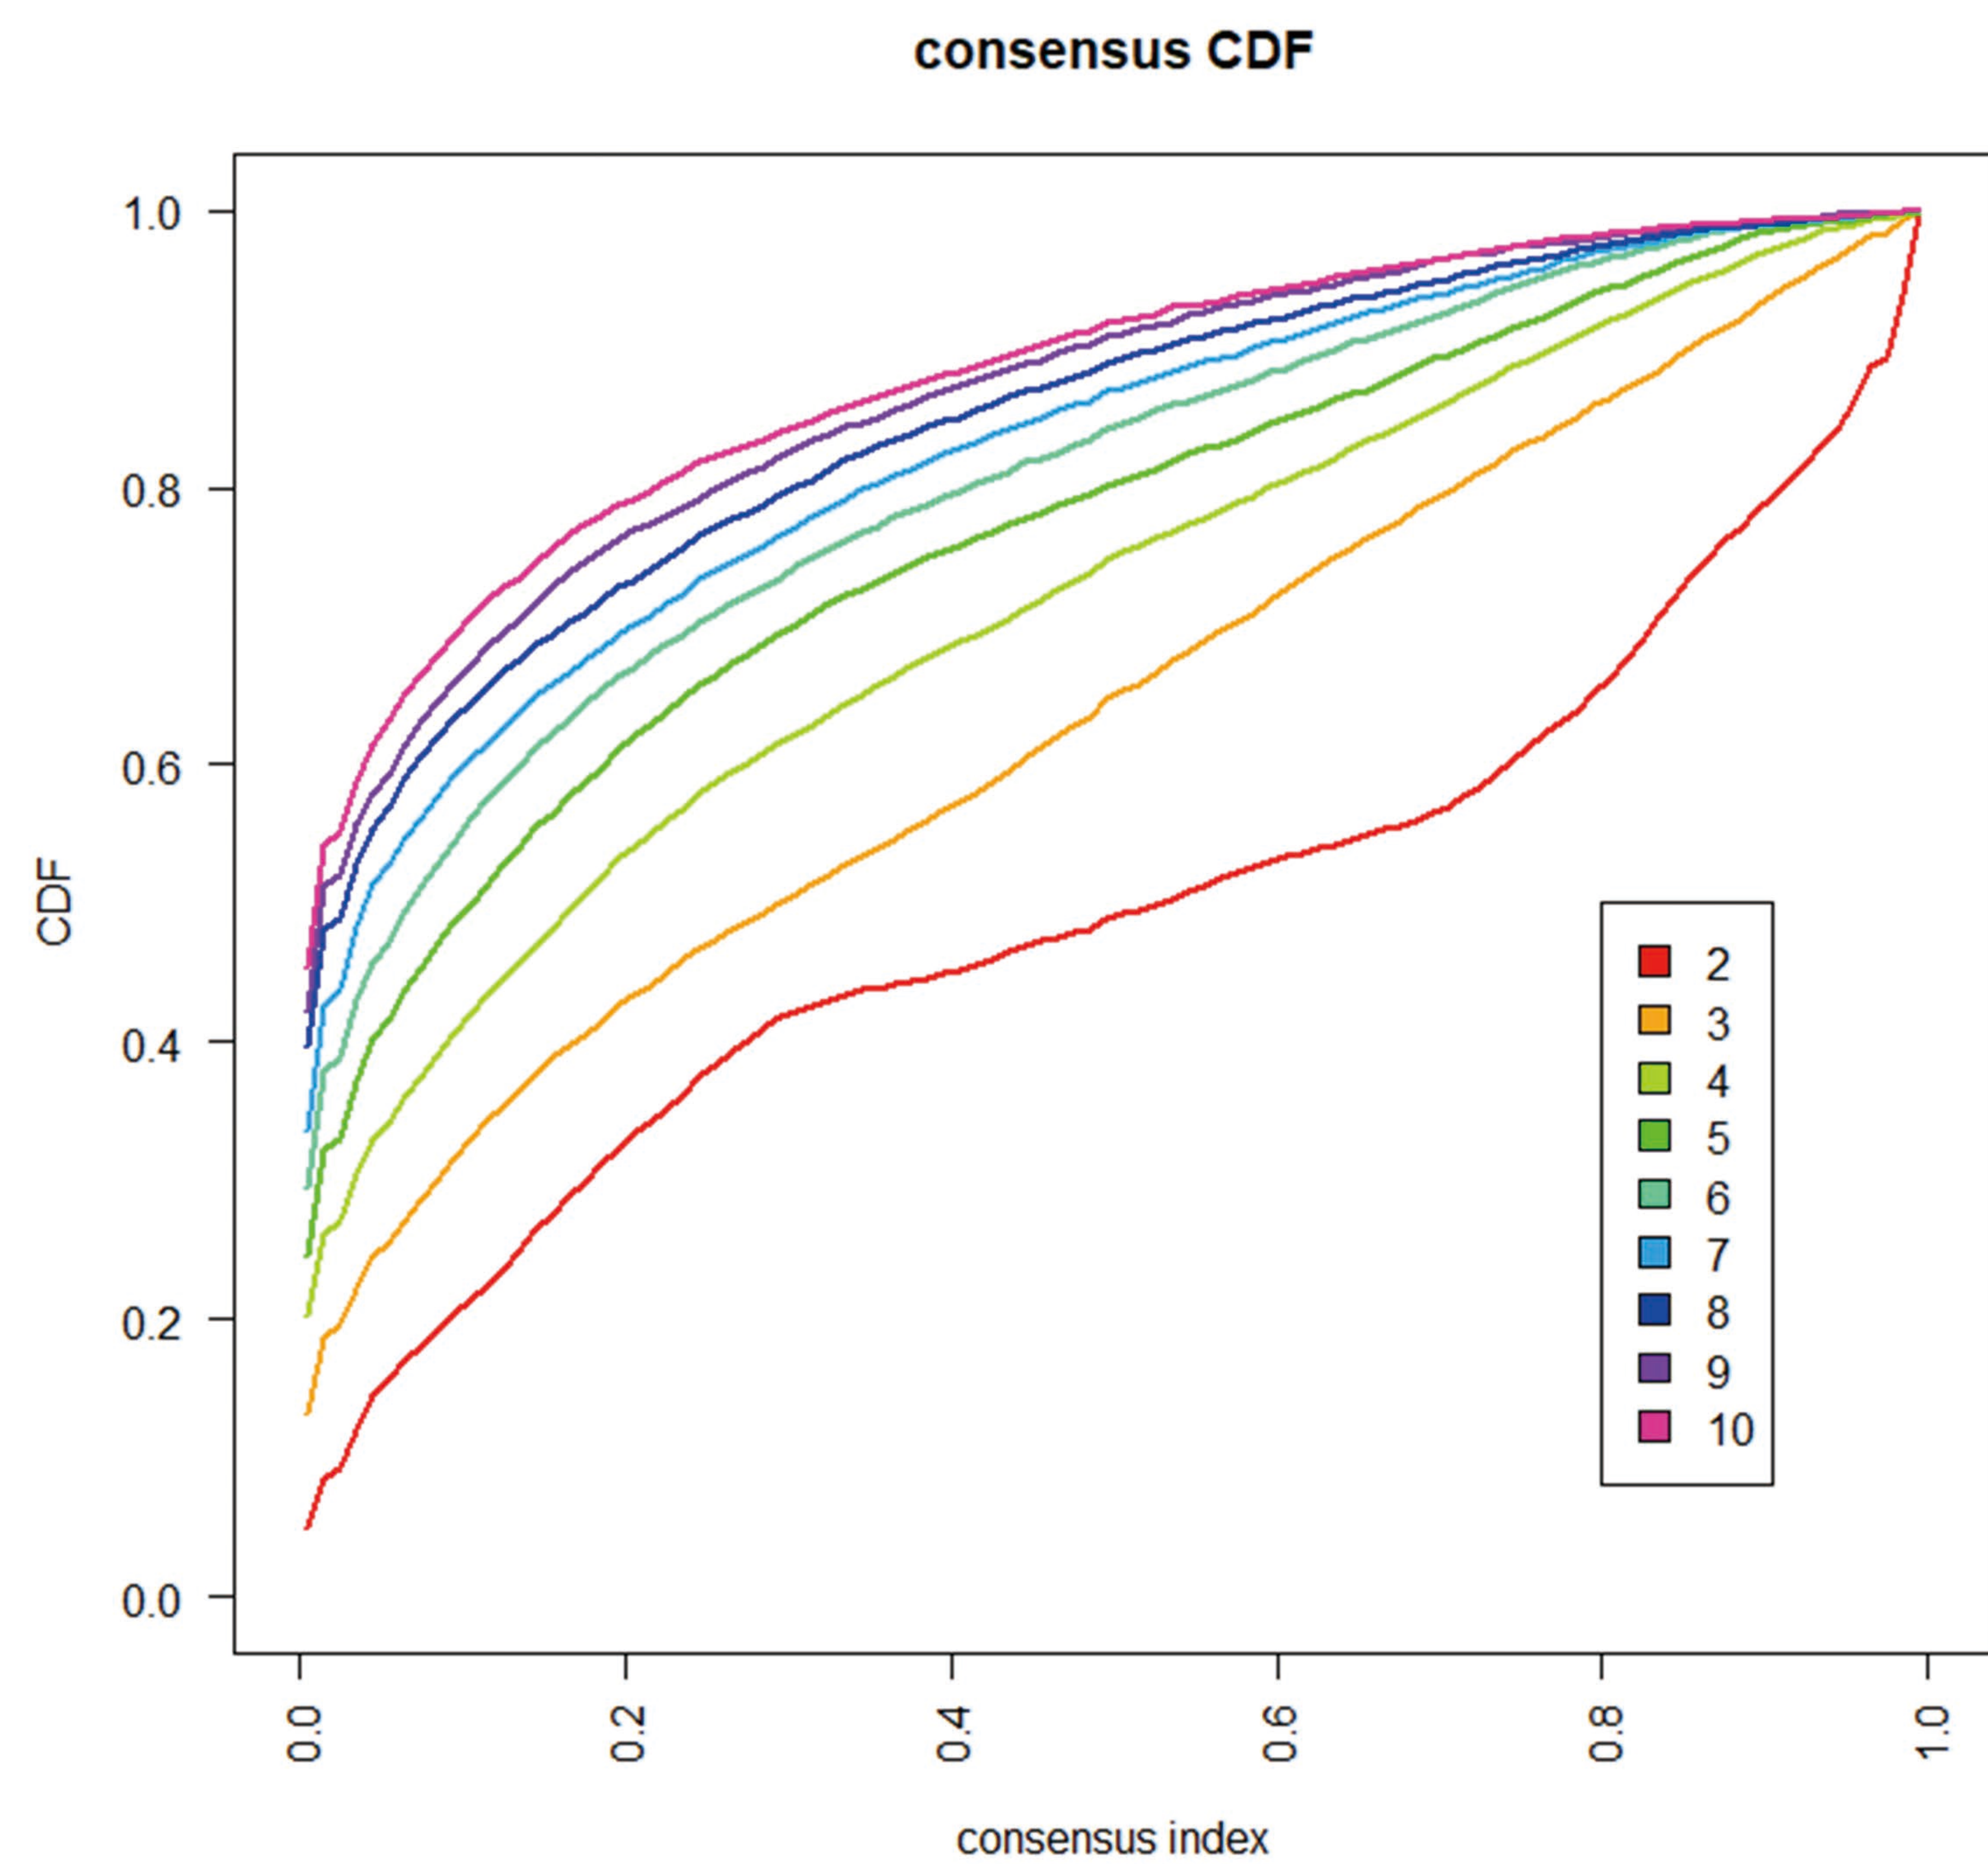

D

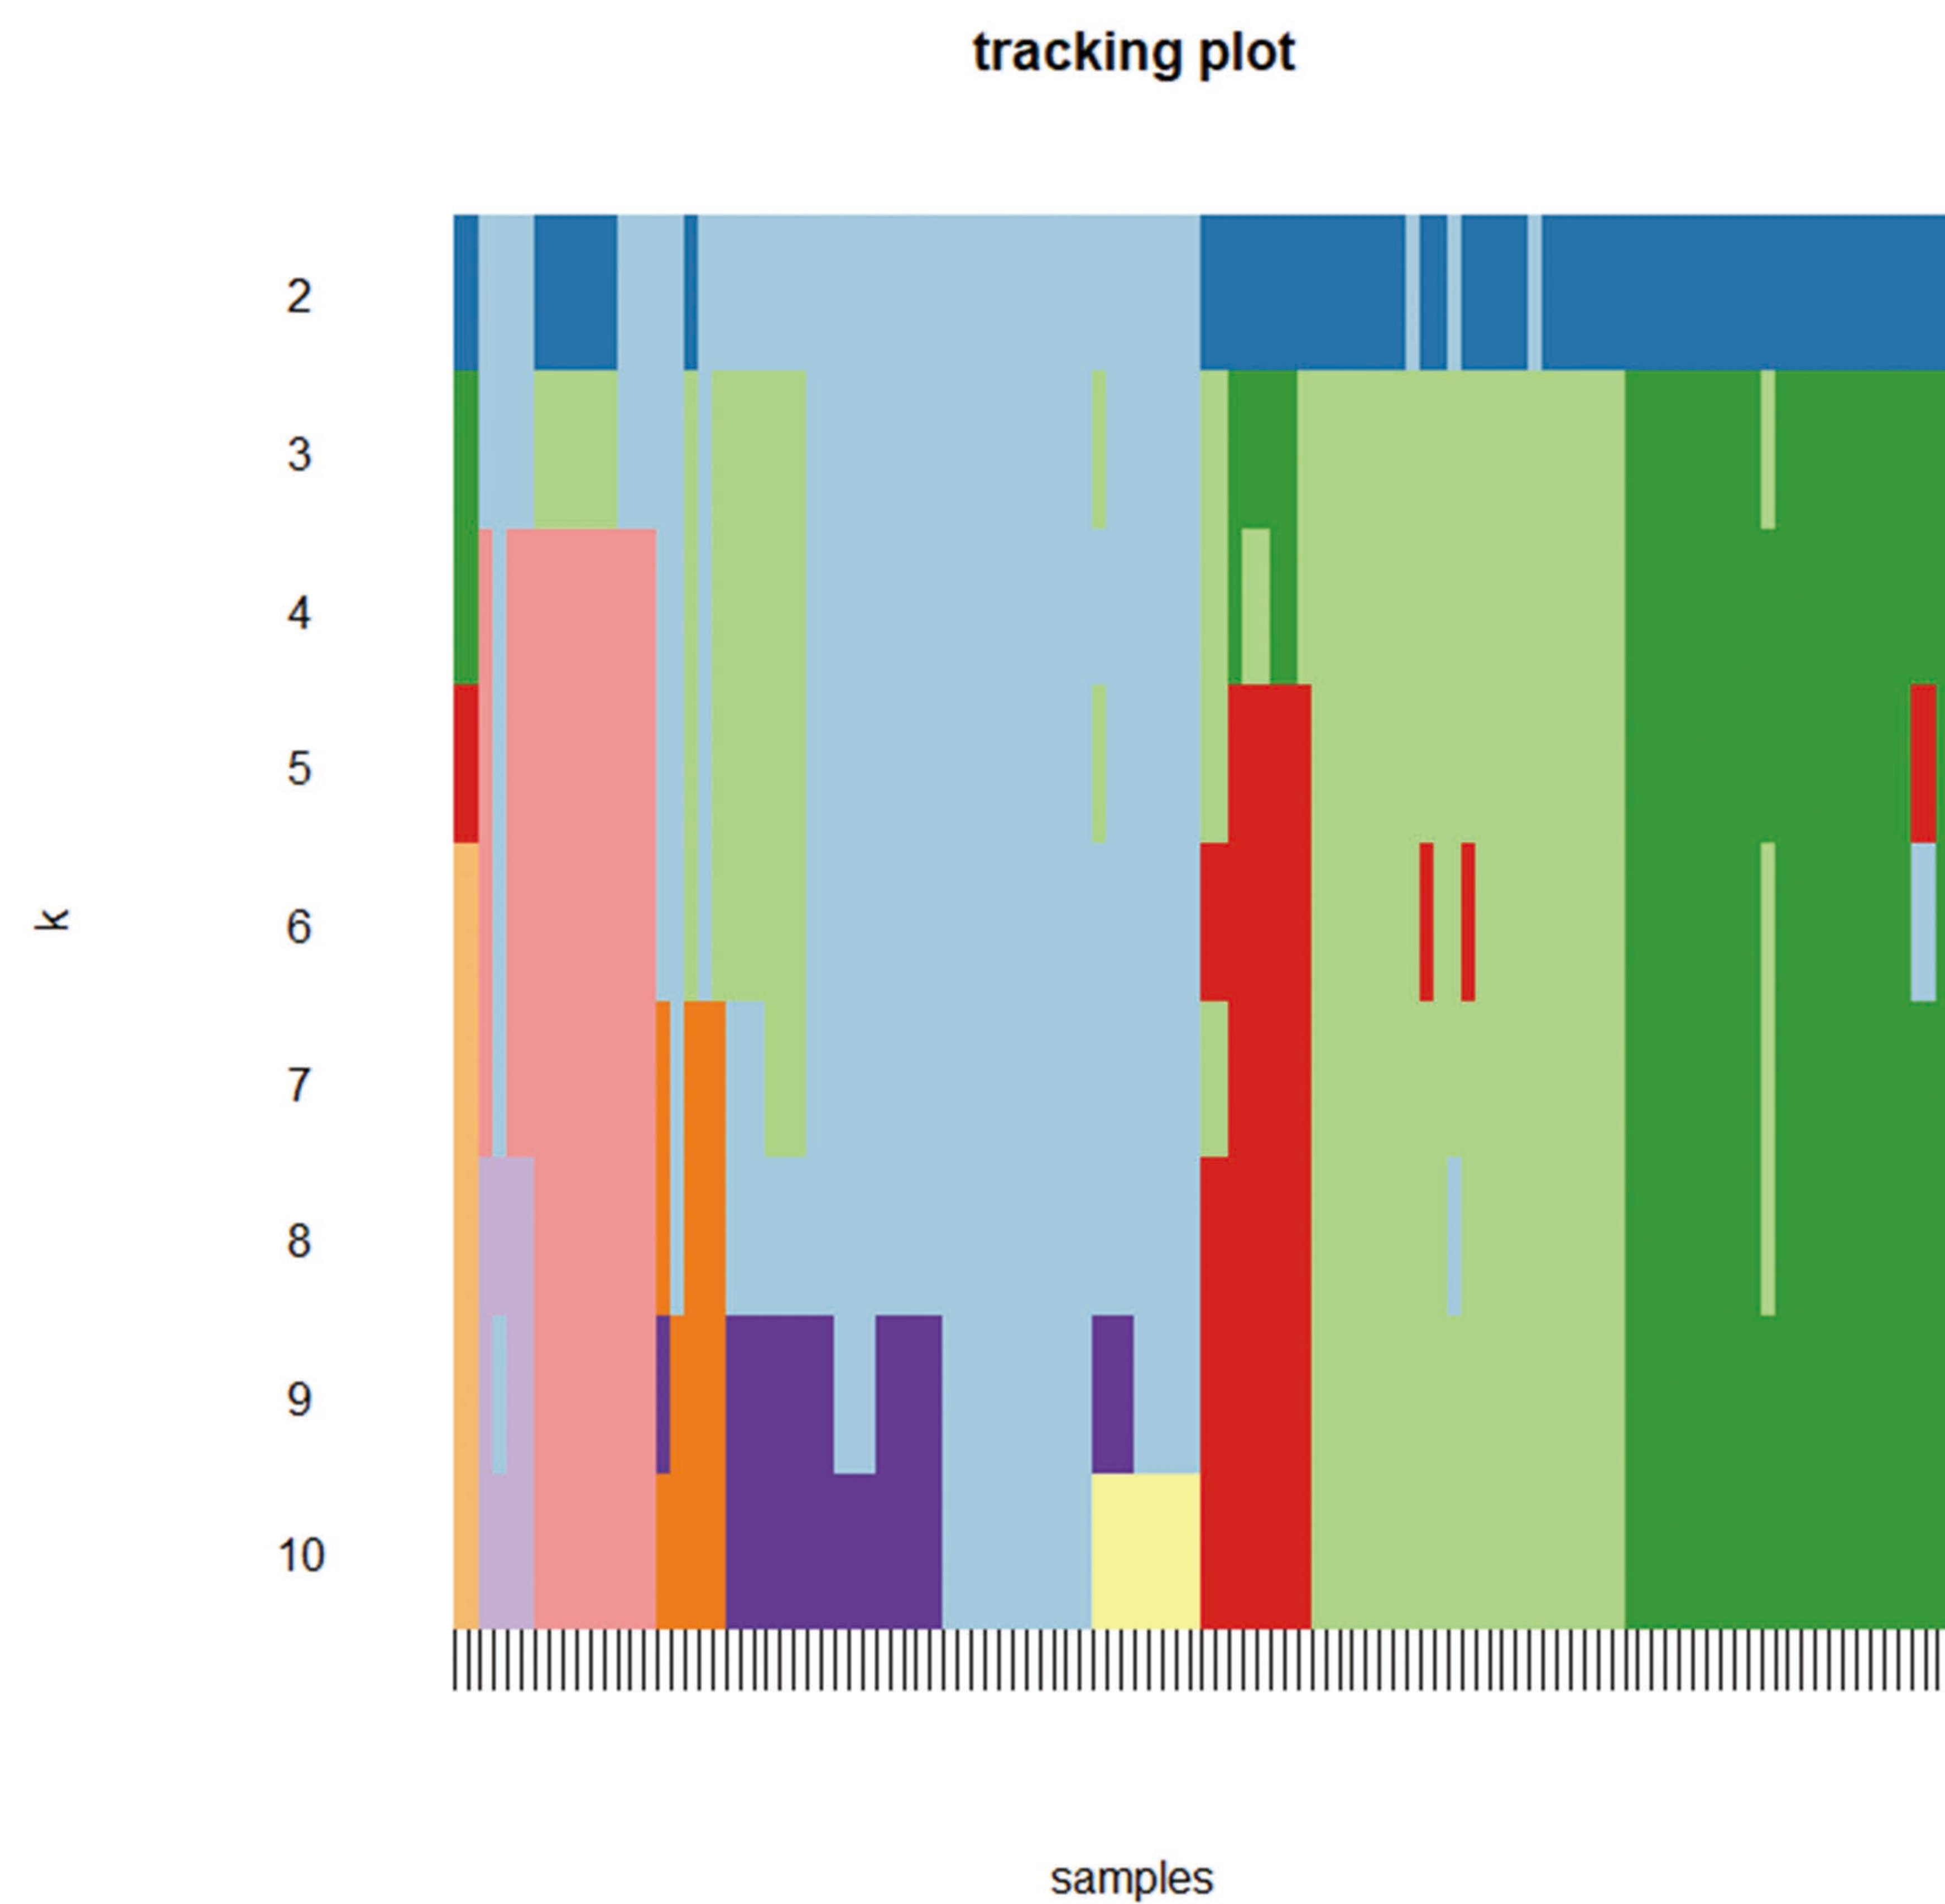

Figure2    Consensus clustering analysis    A Consensus clustering when  $k=2$     B. Consensus clustering cumulative distribution function (CDF) C. Relative change in the area under the CDF curve when  $k$  from 2 to 10 D. Tracking plot; CDF: cumulative distribution function

A

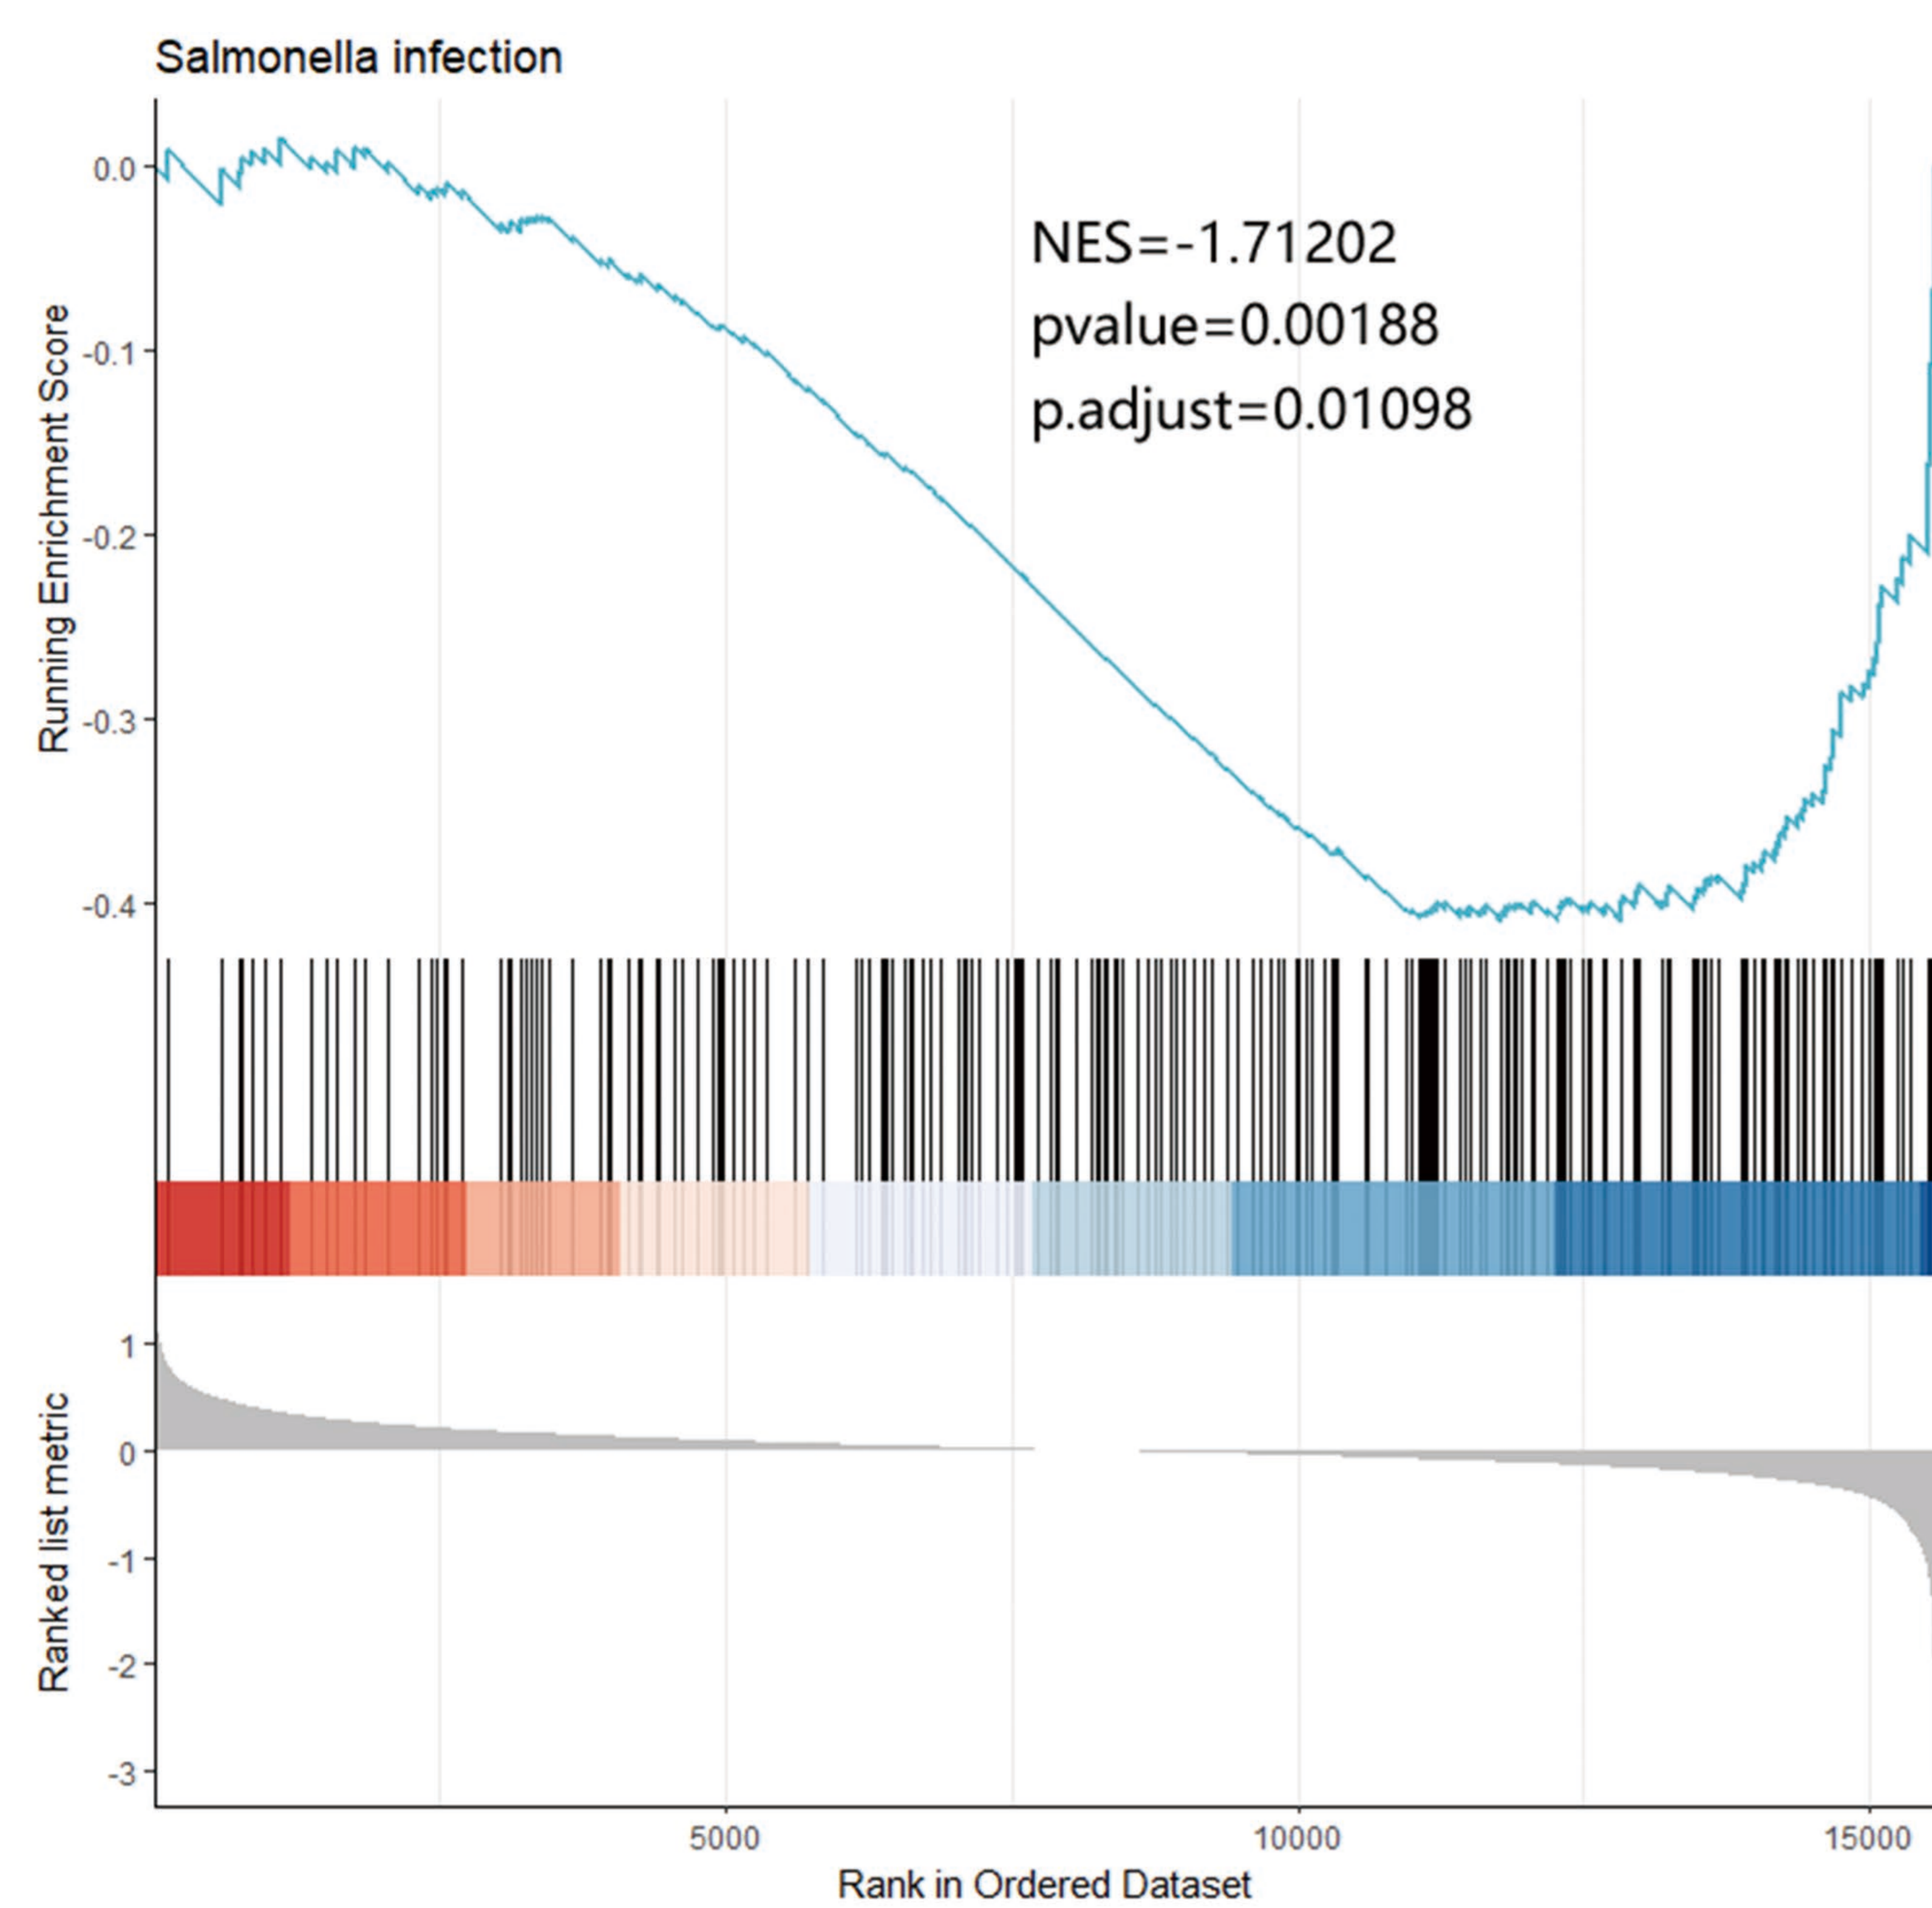

B

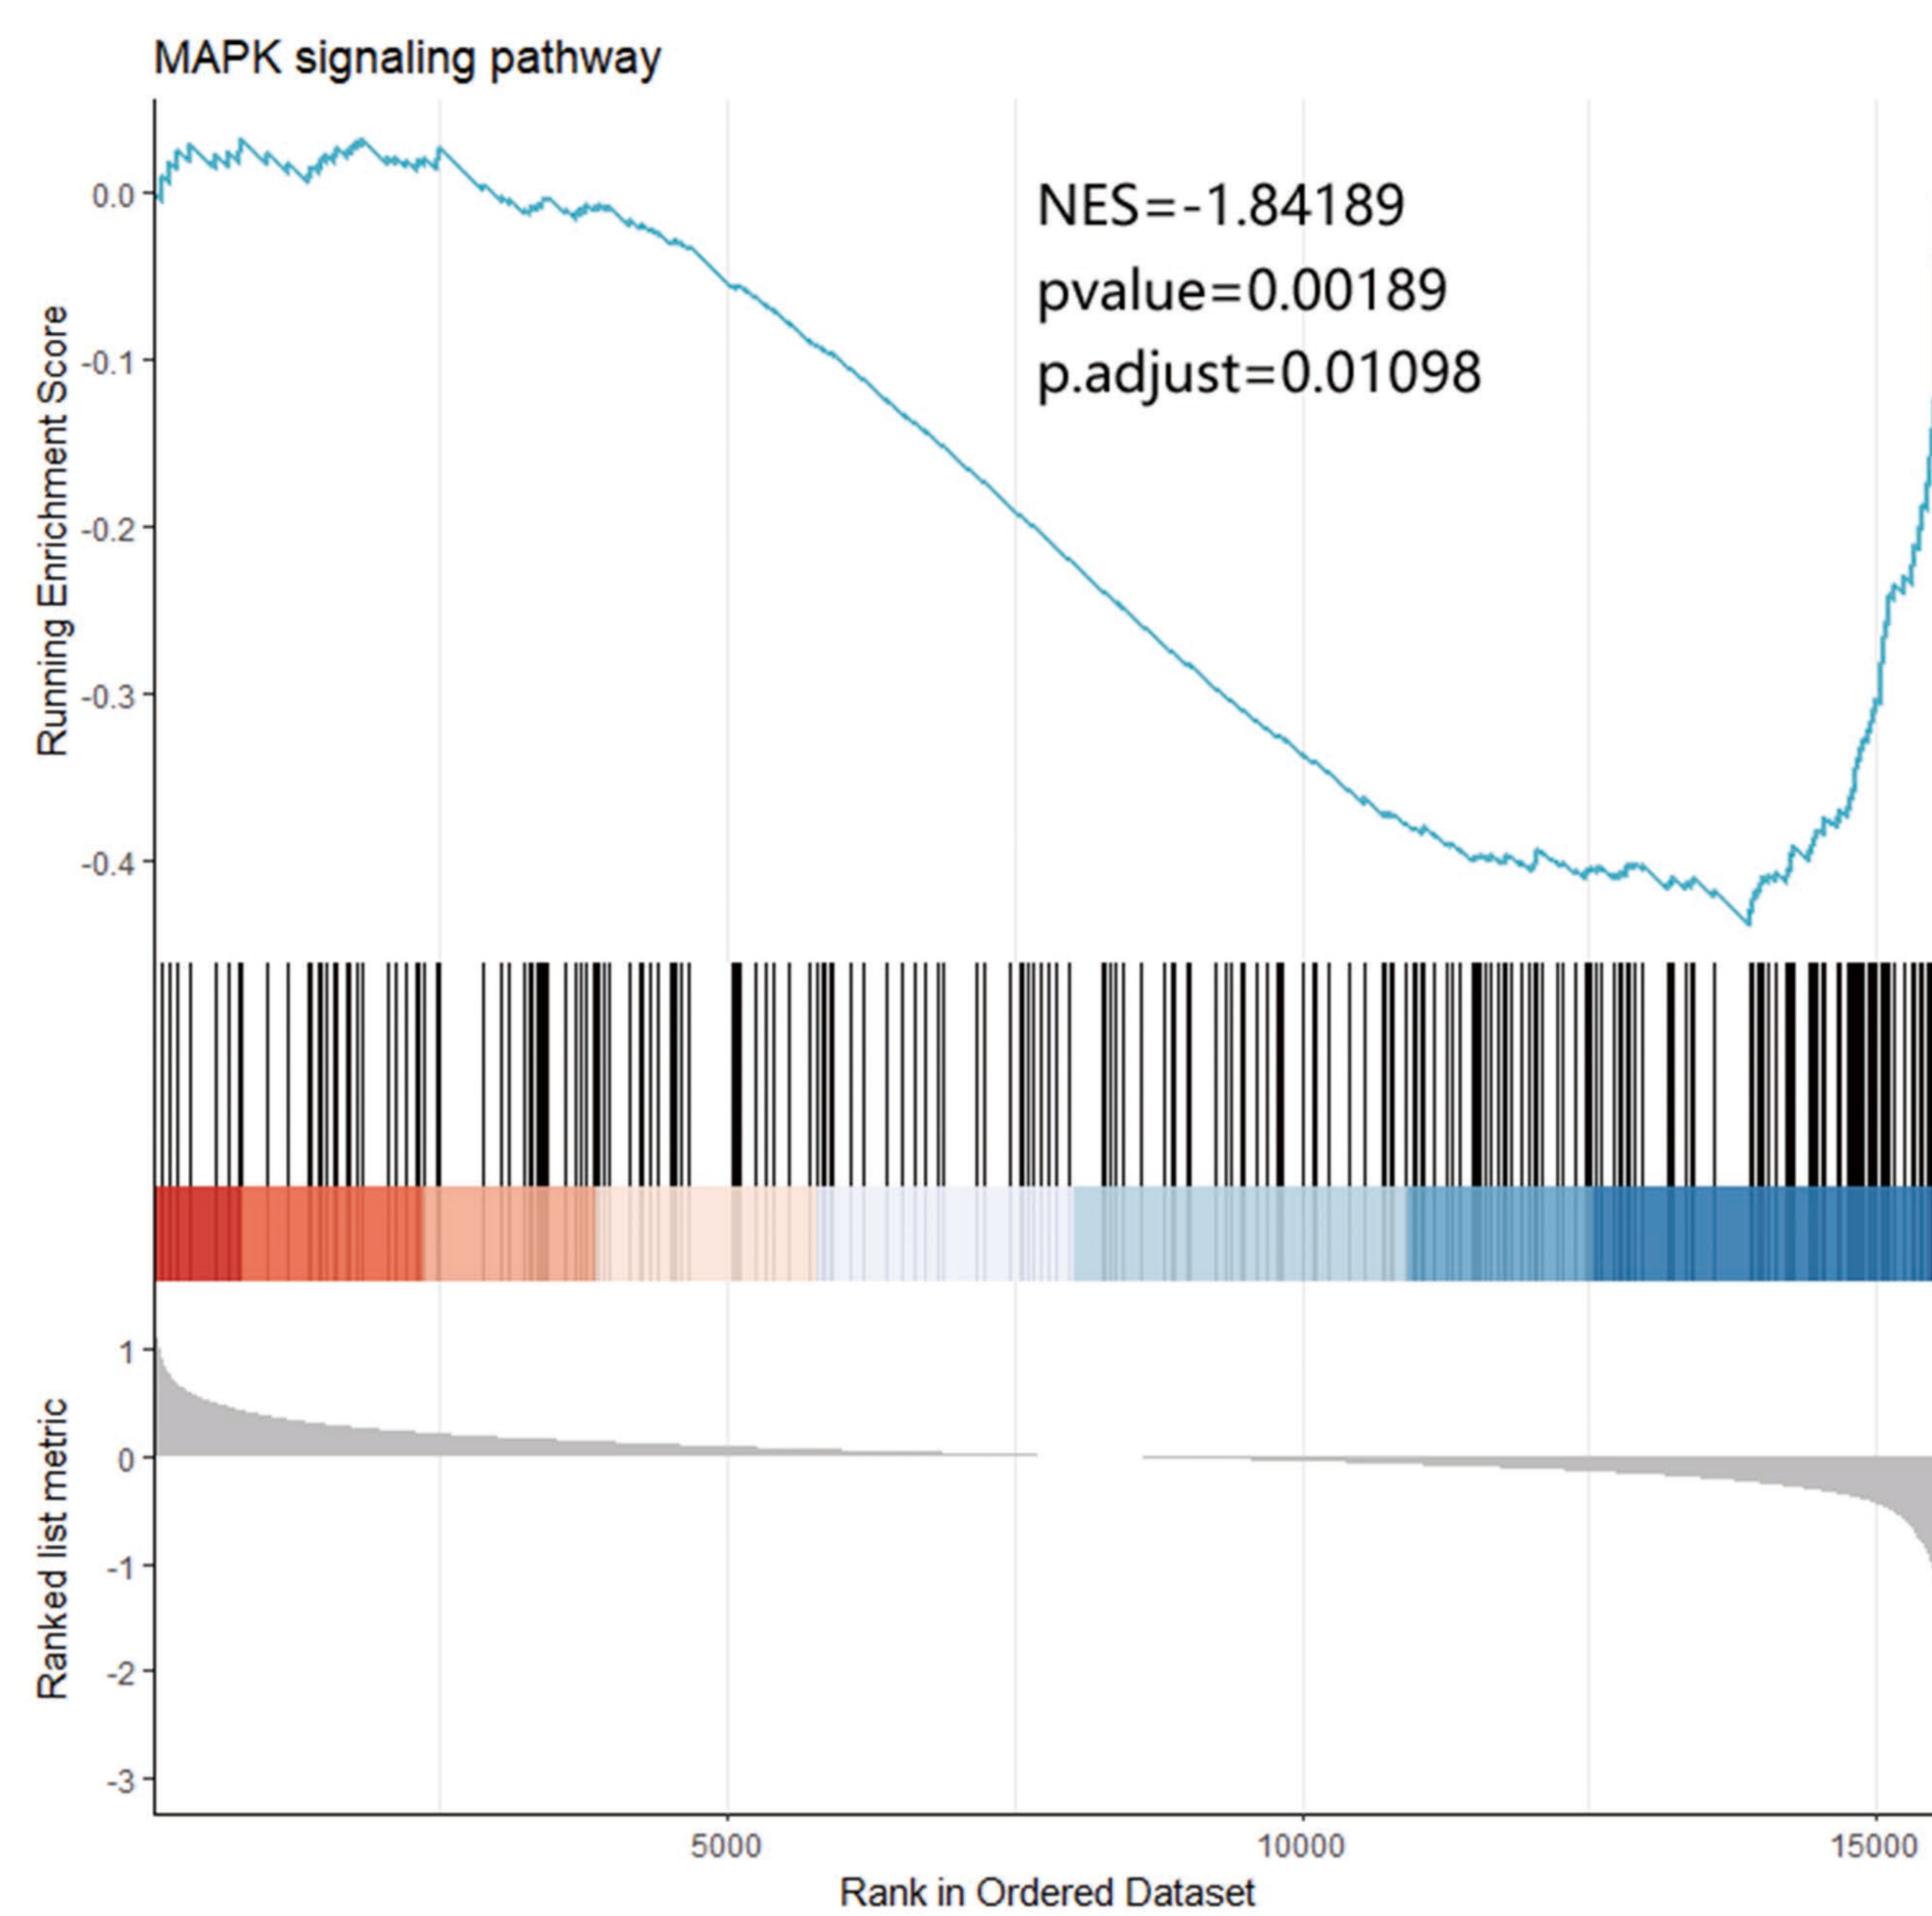

C

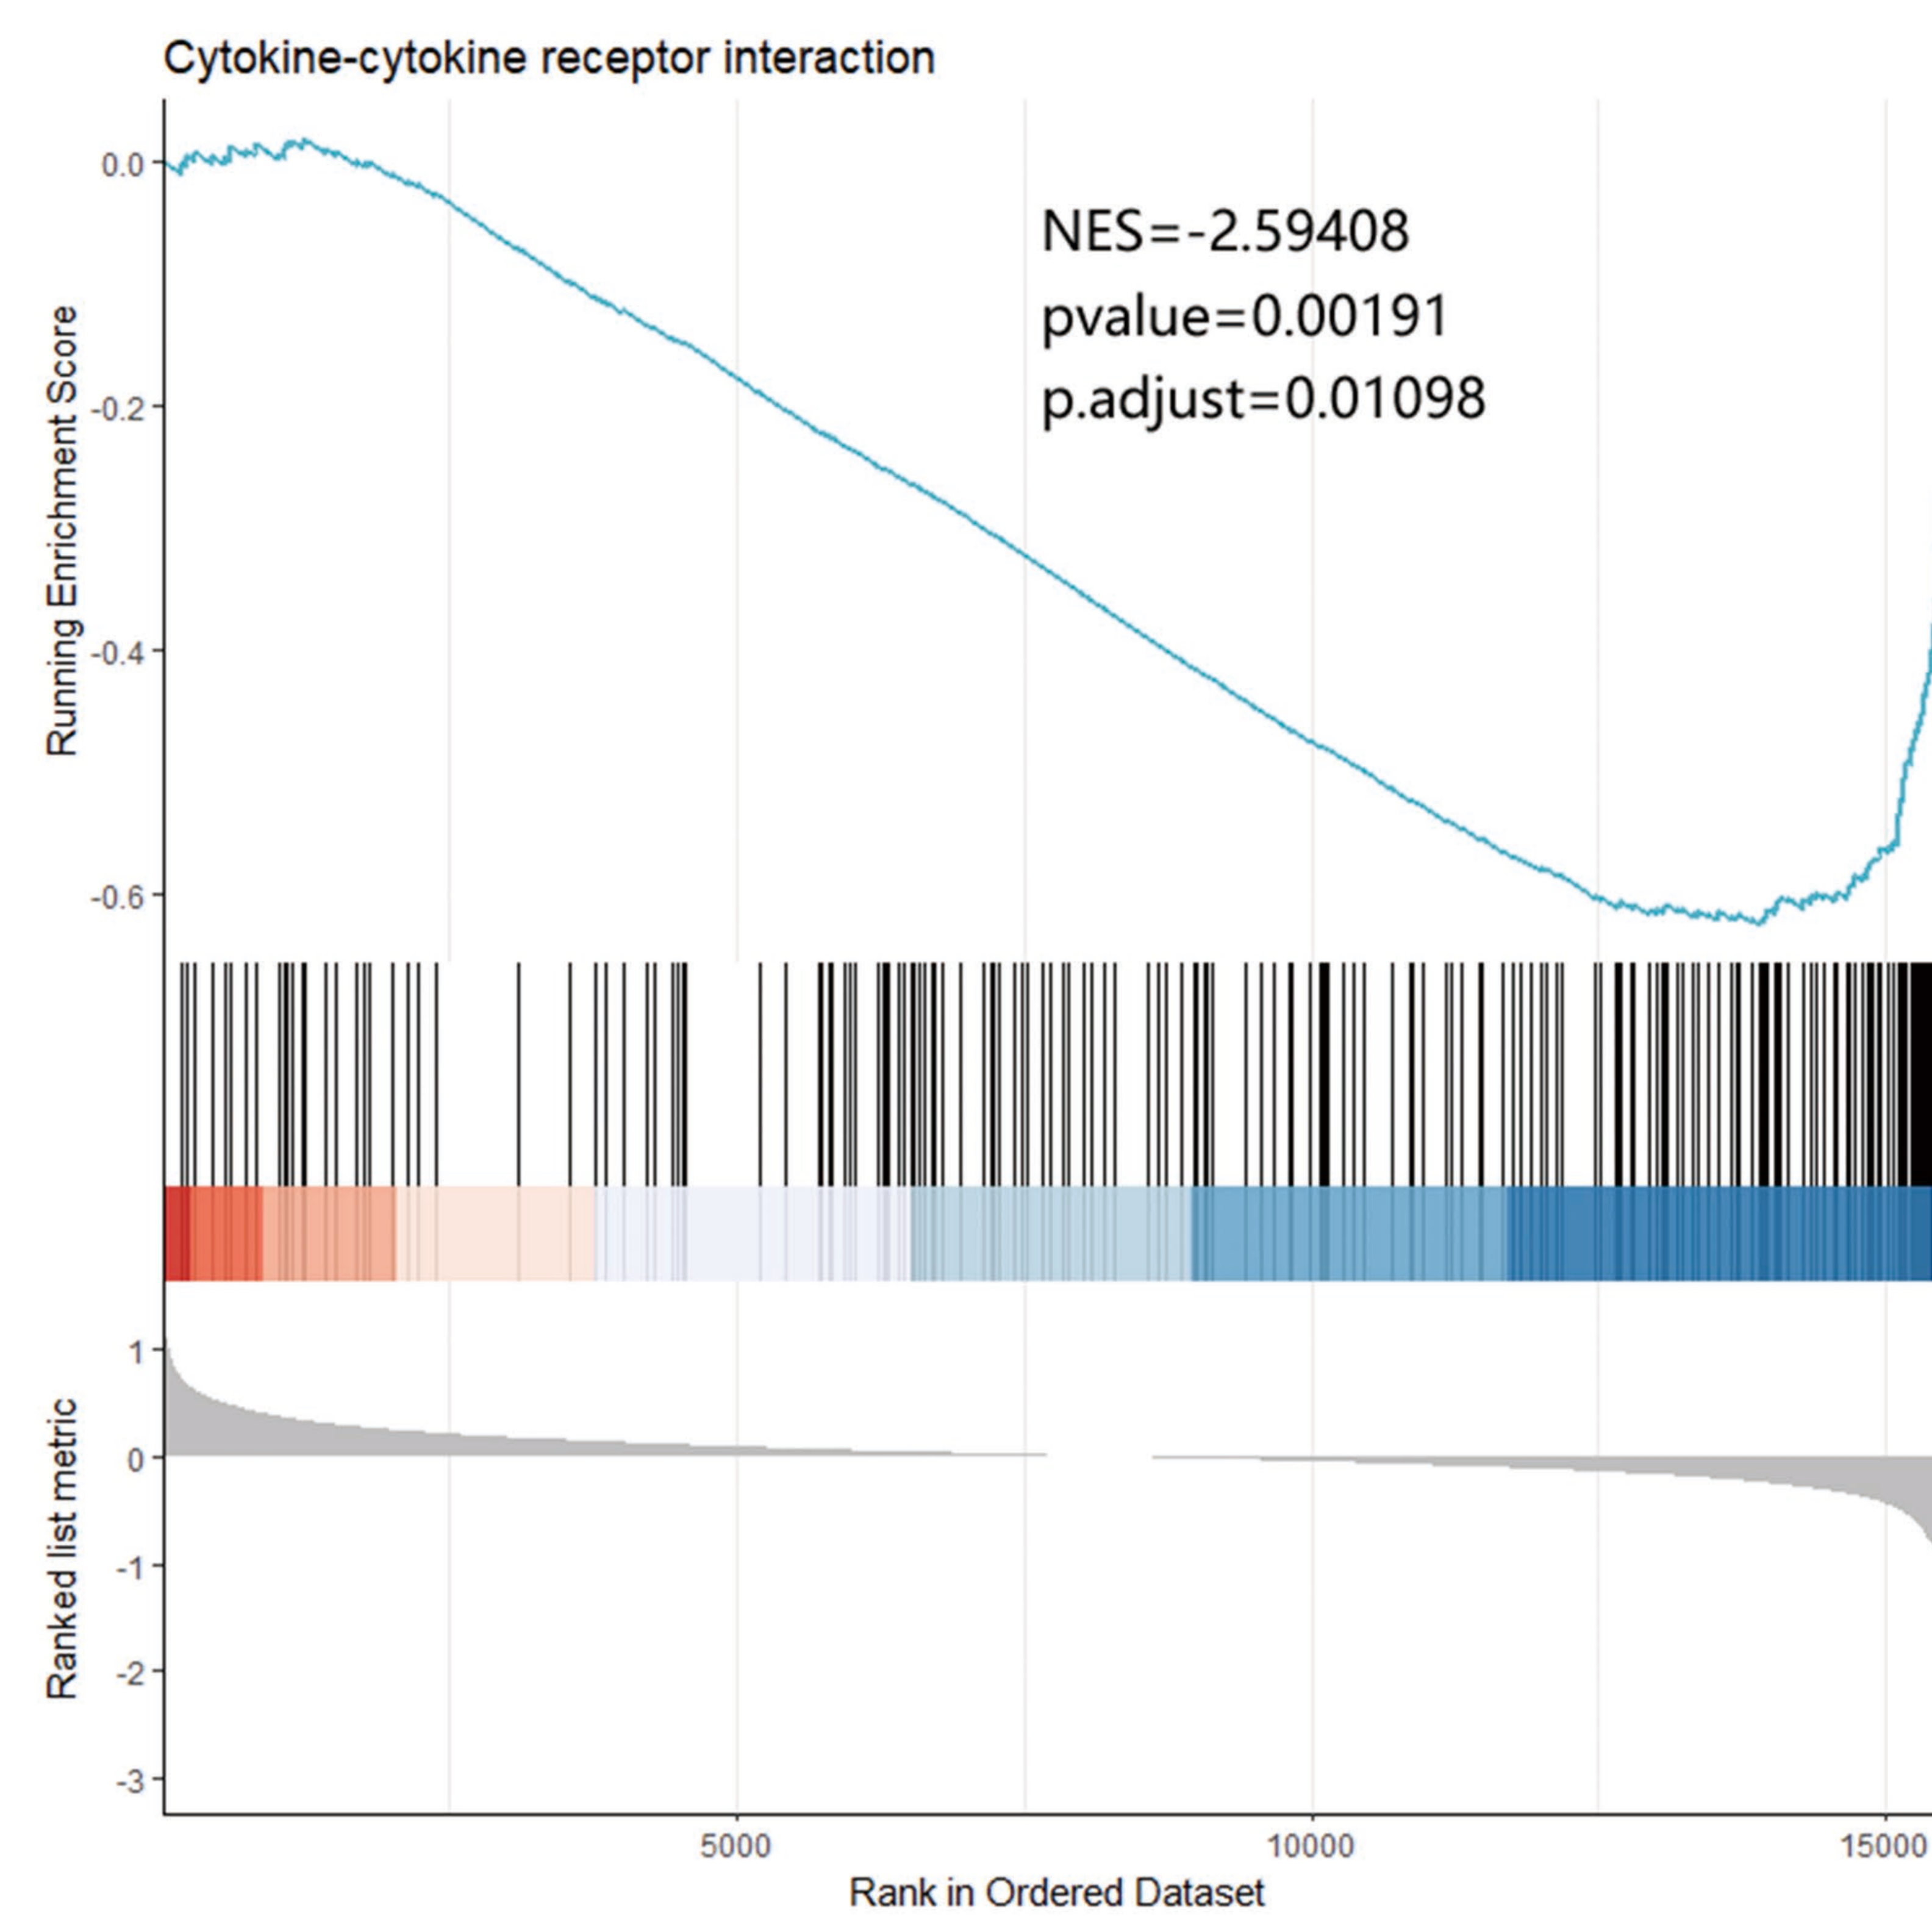

D

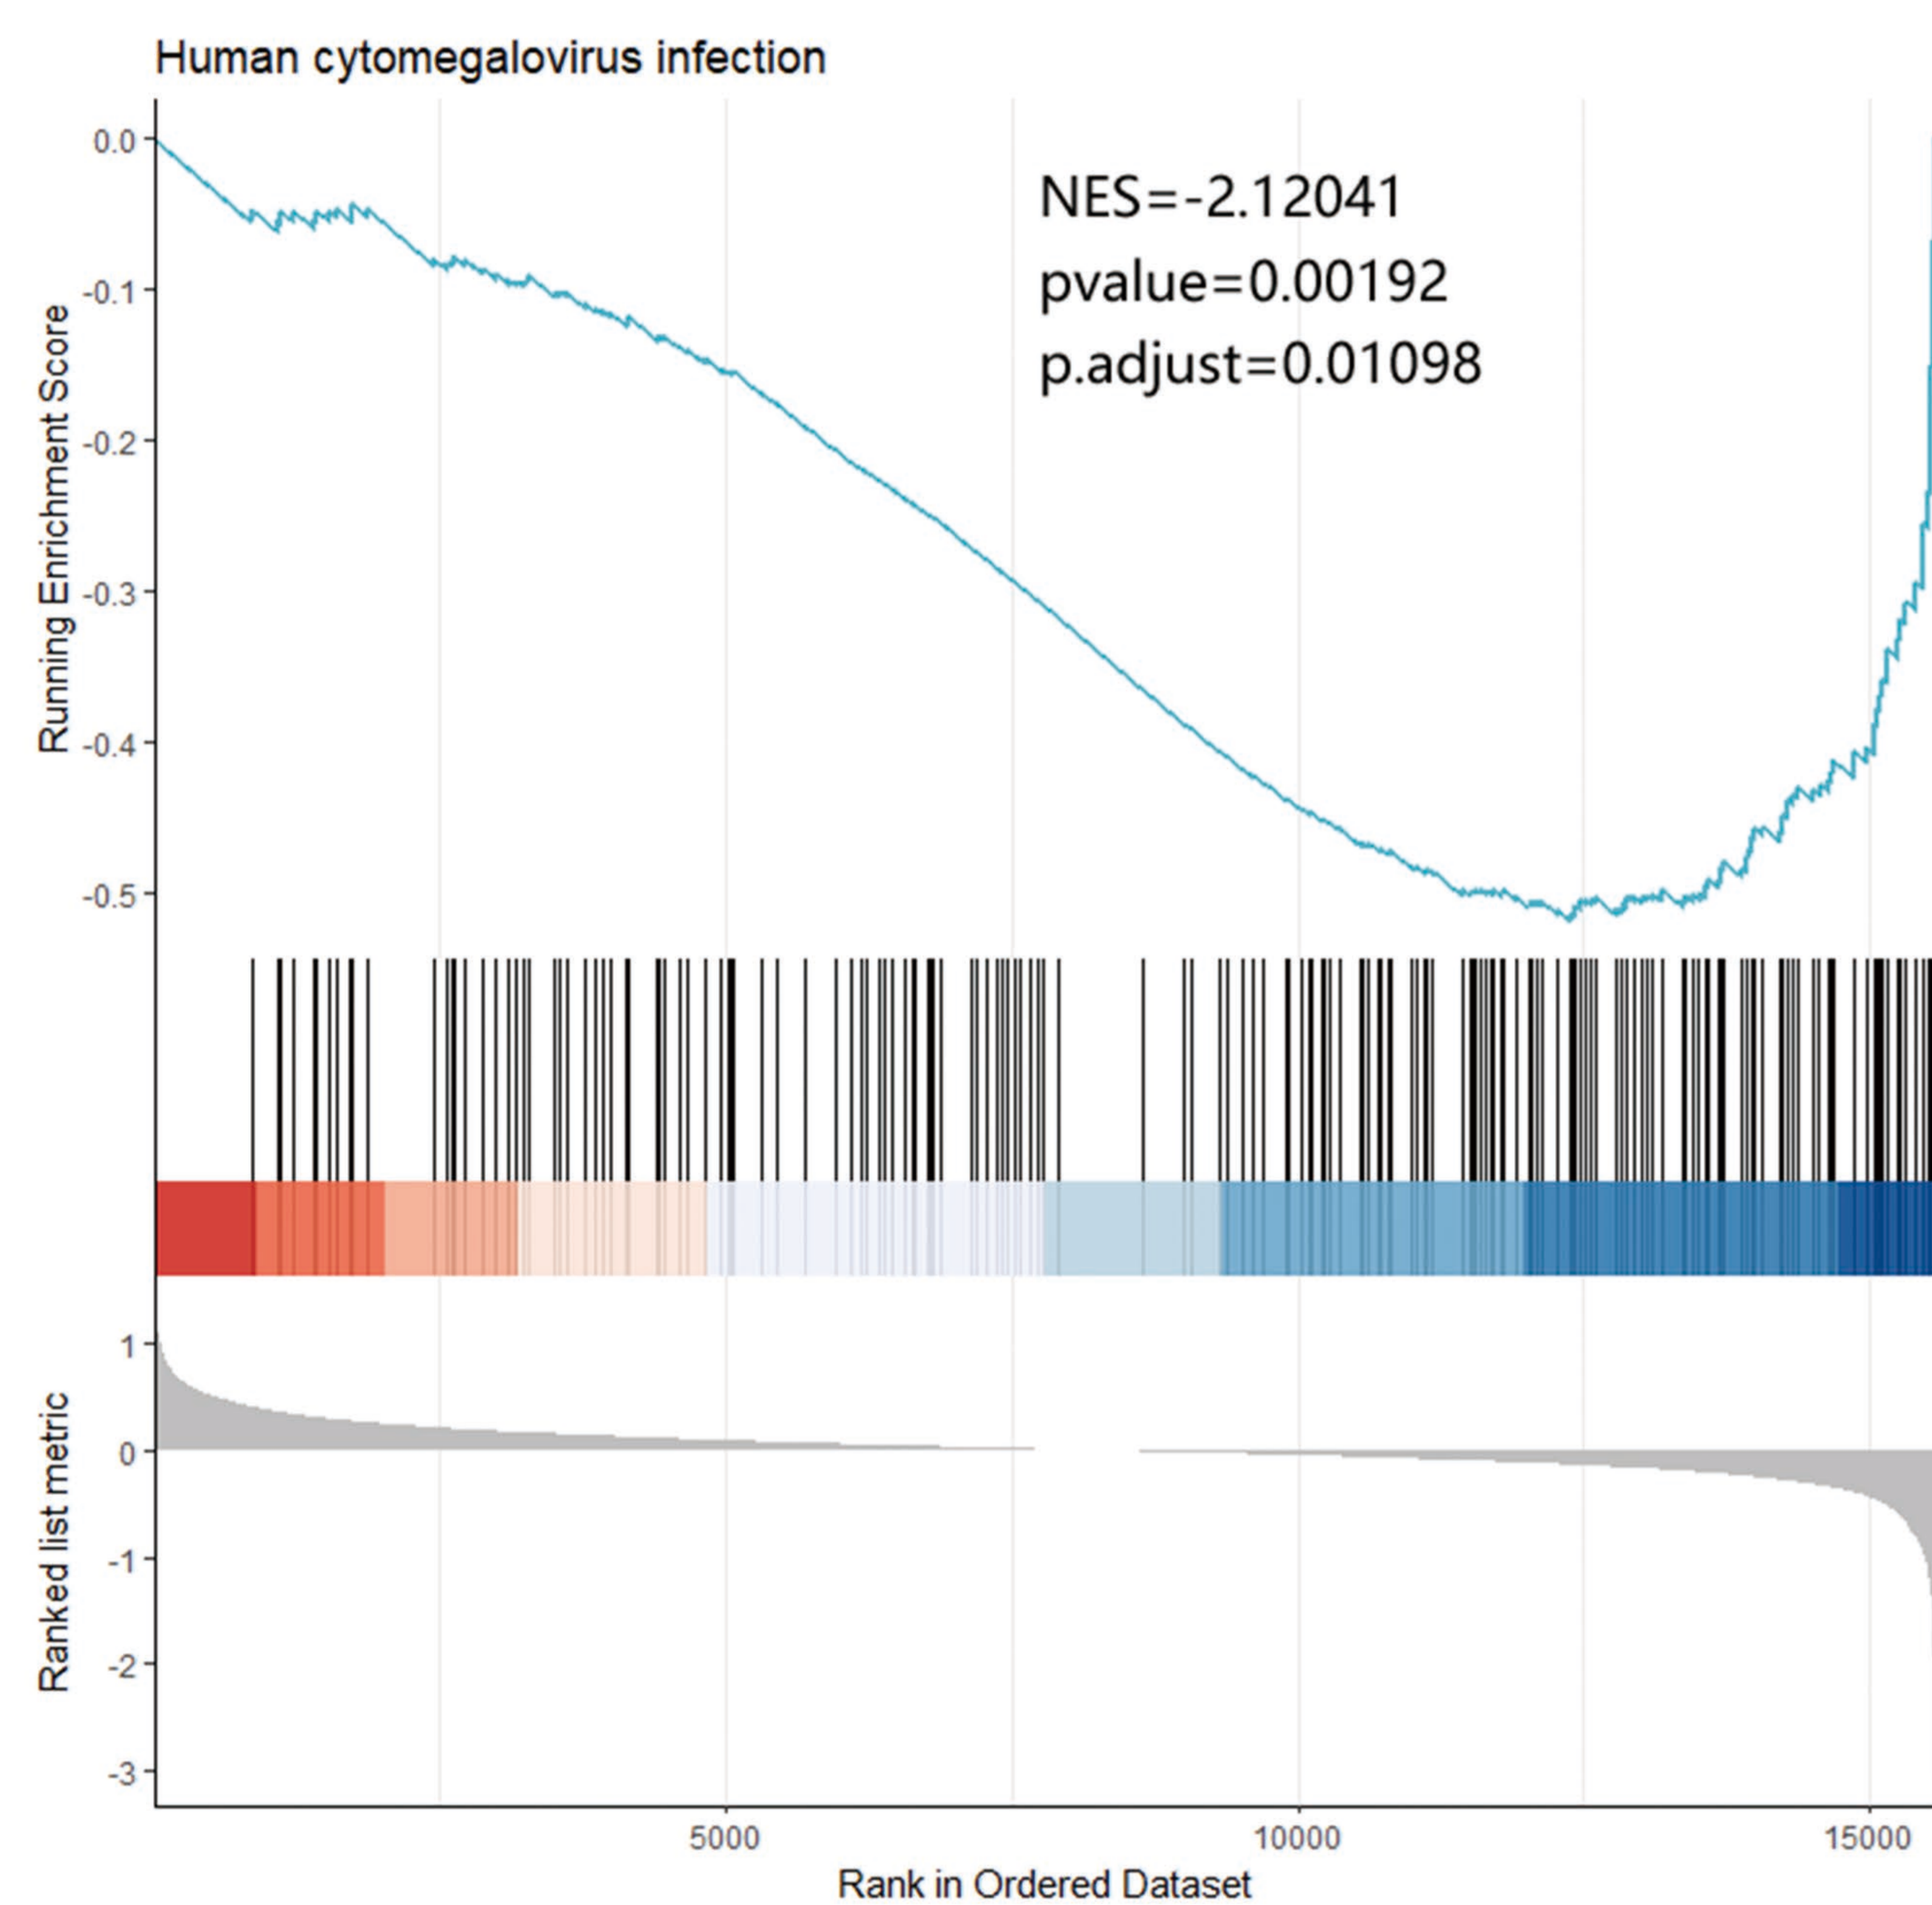

E

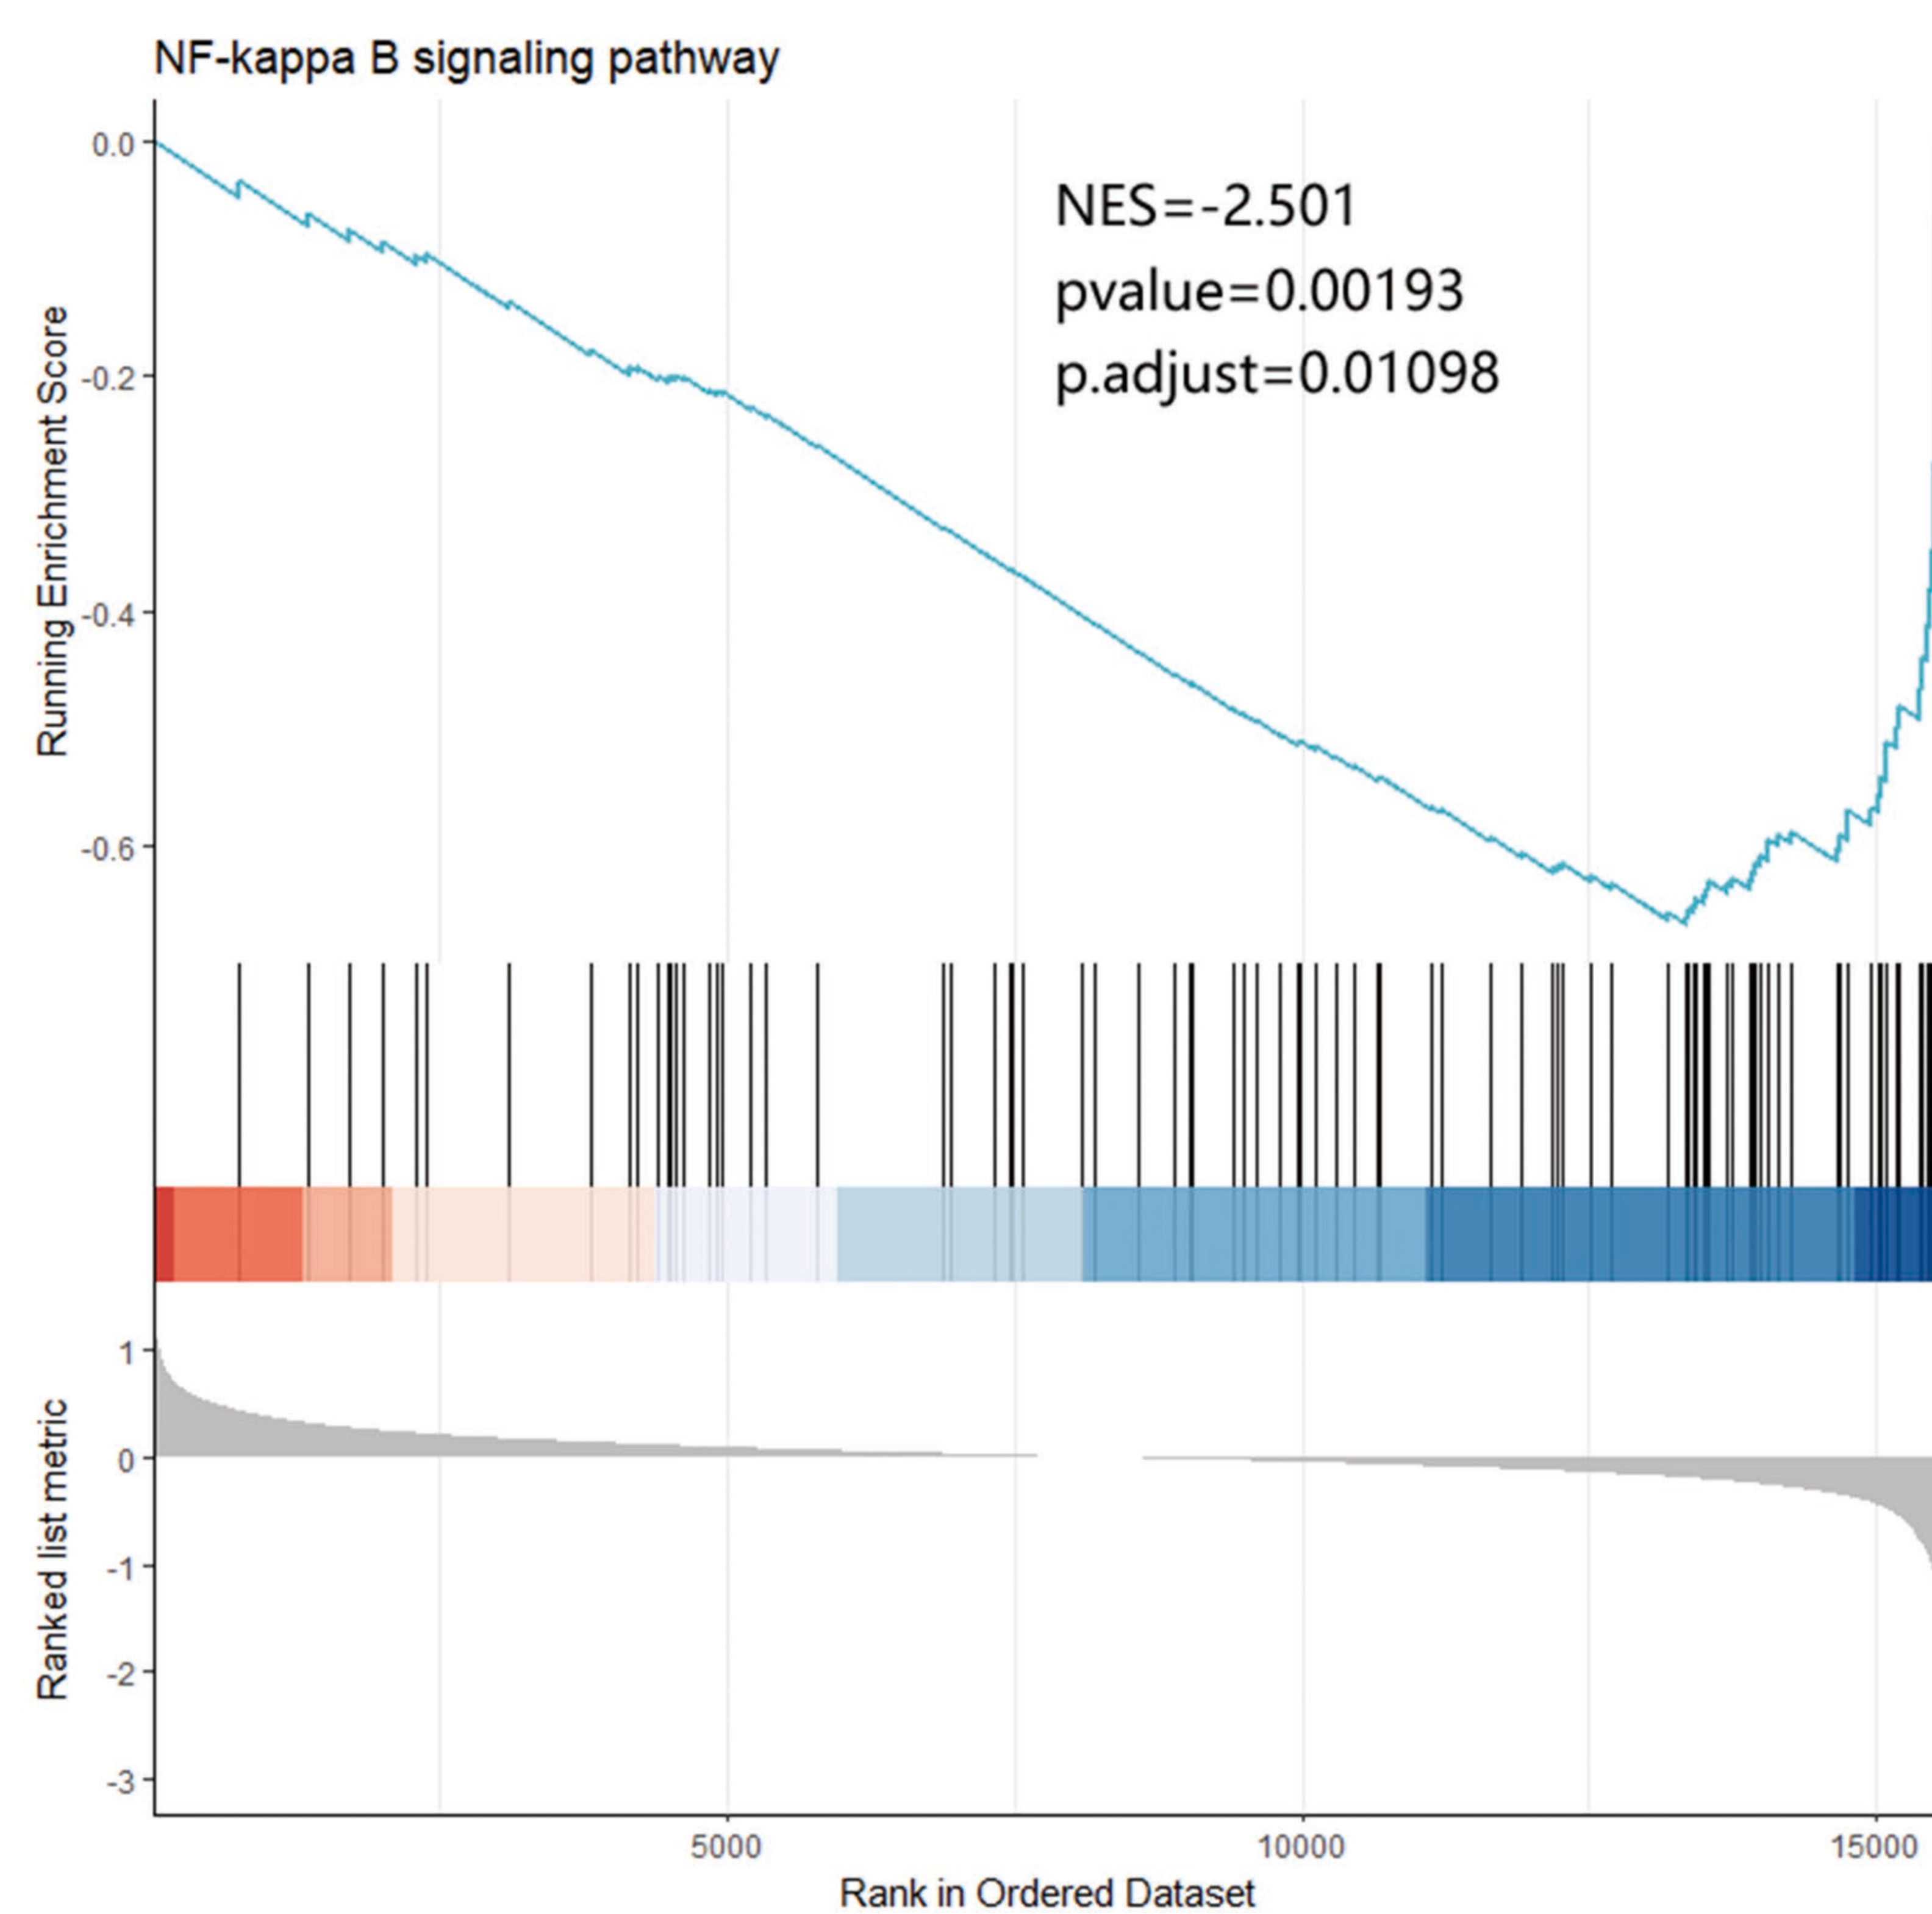

F

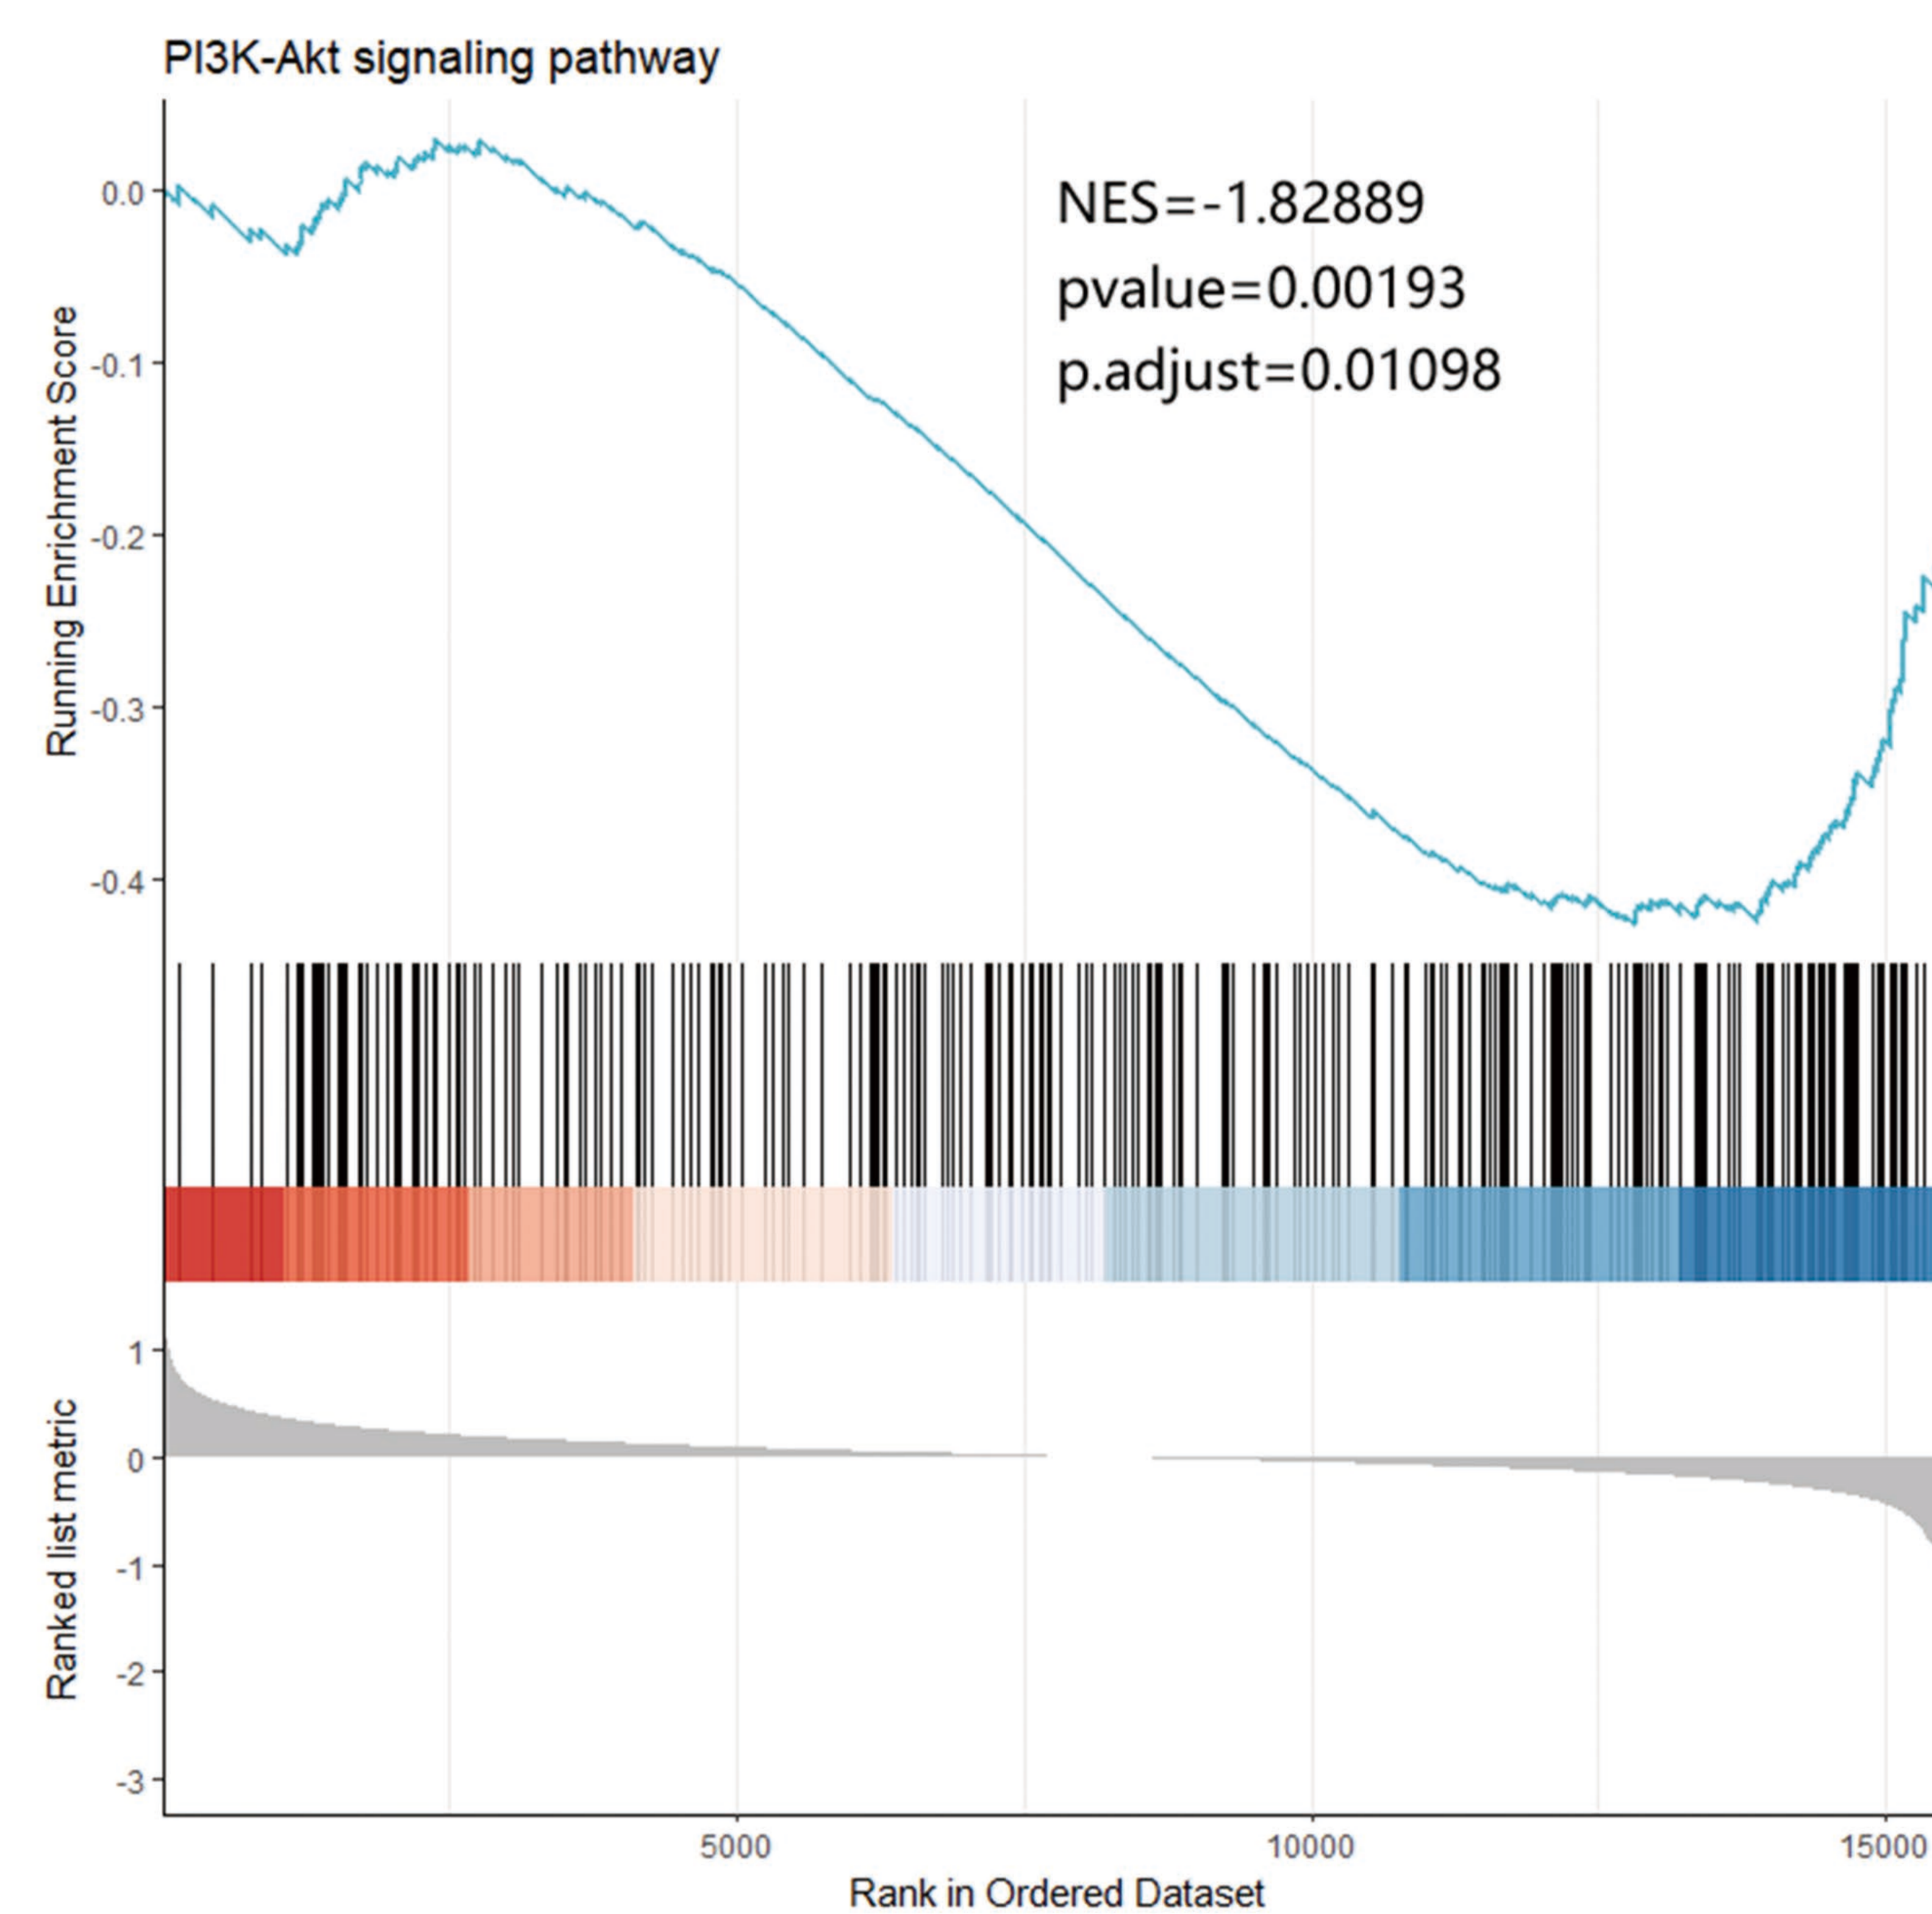

G

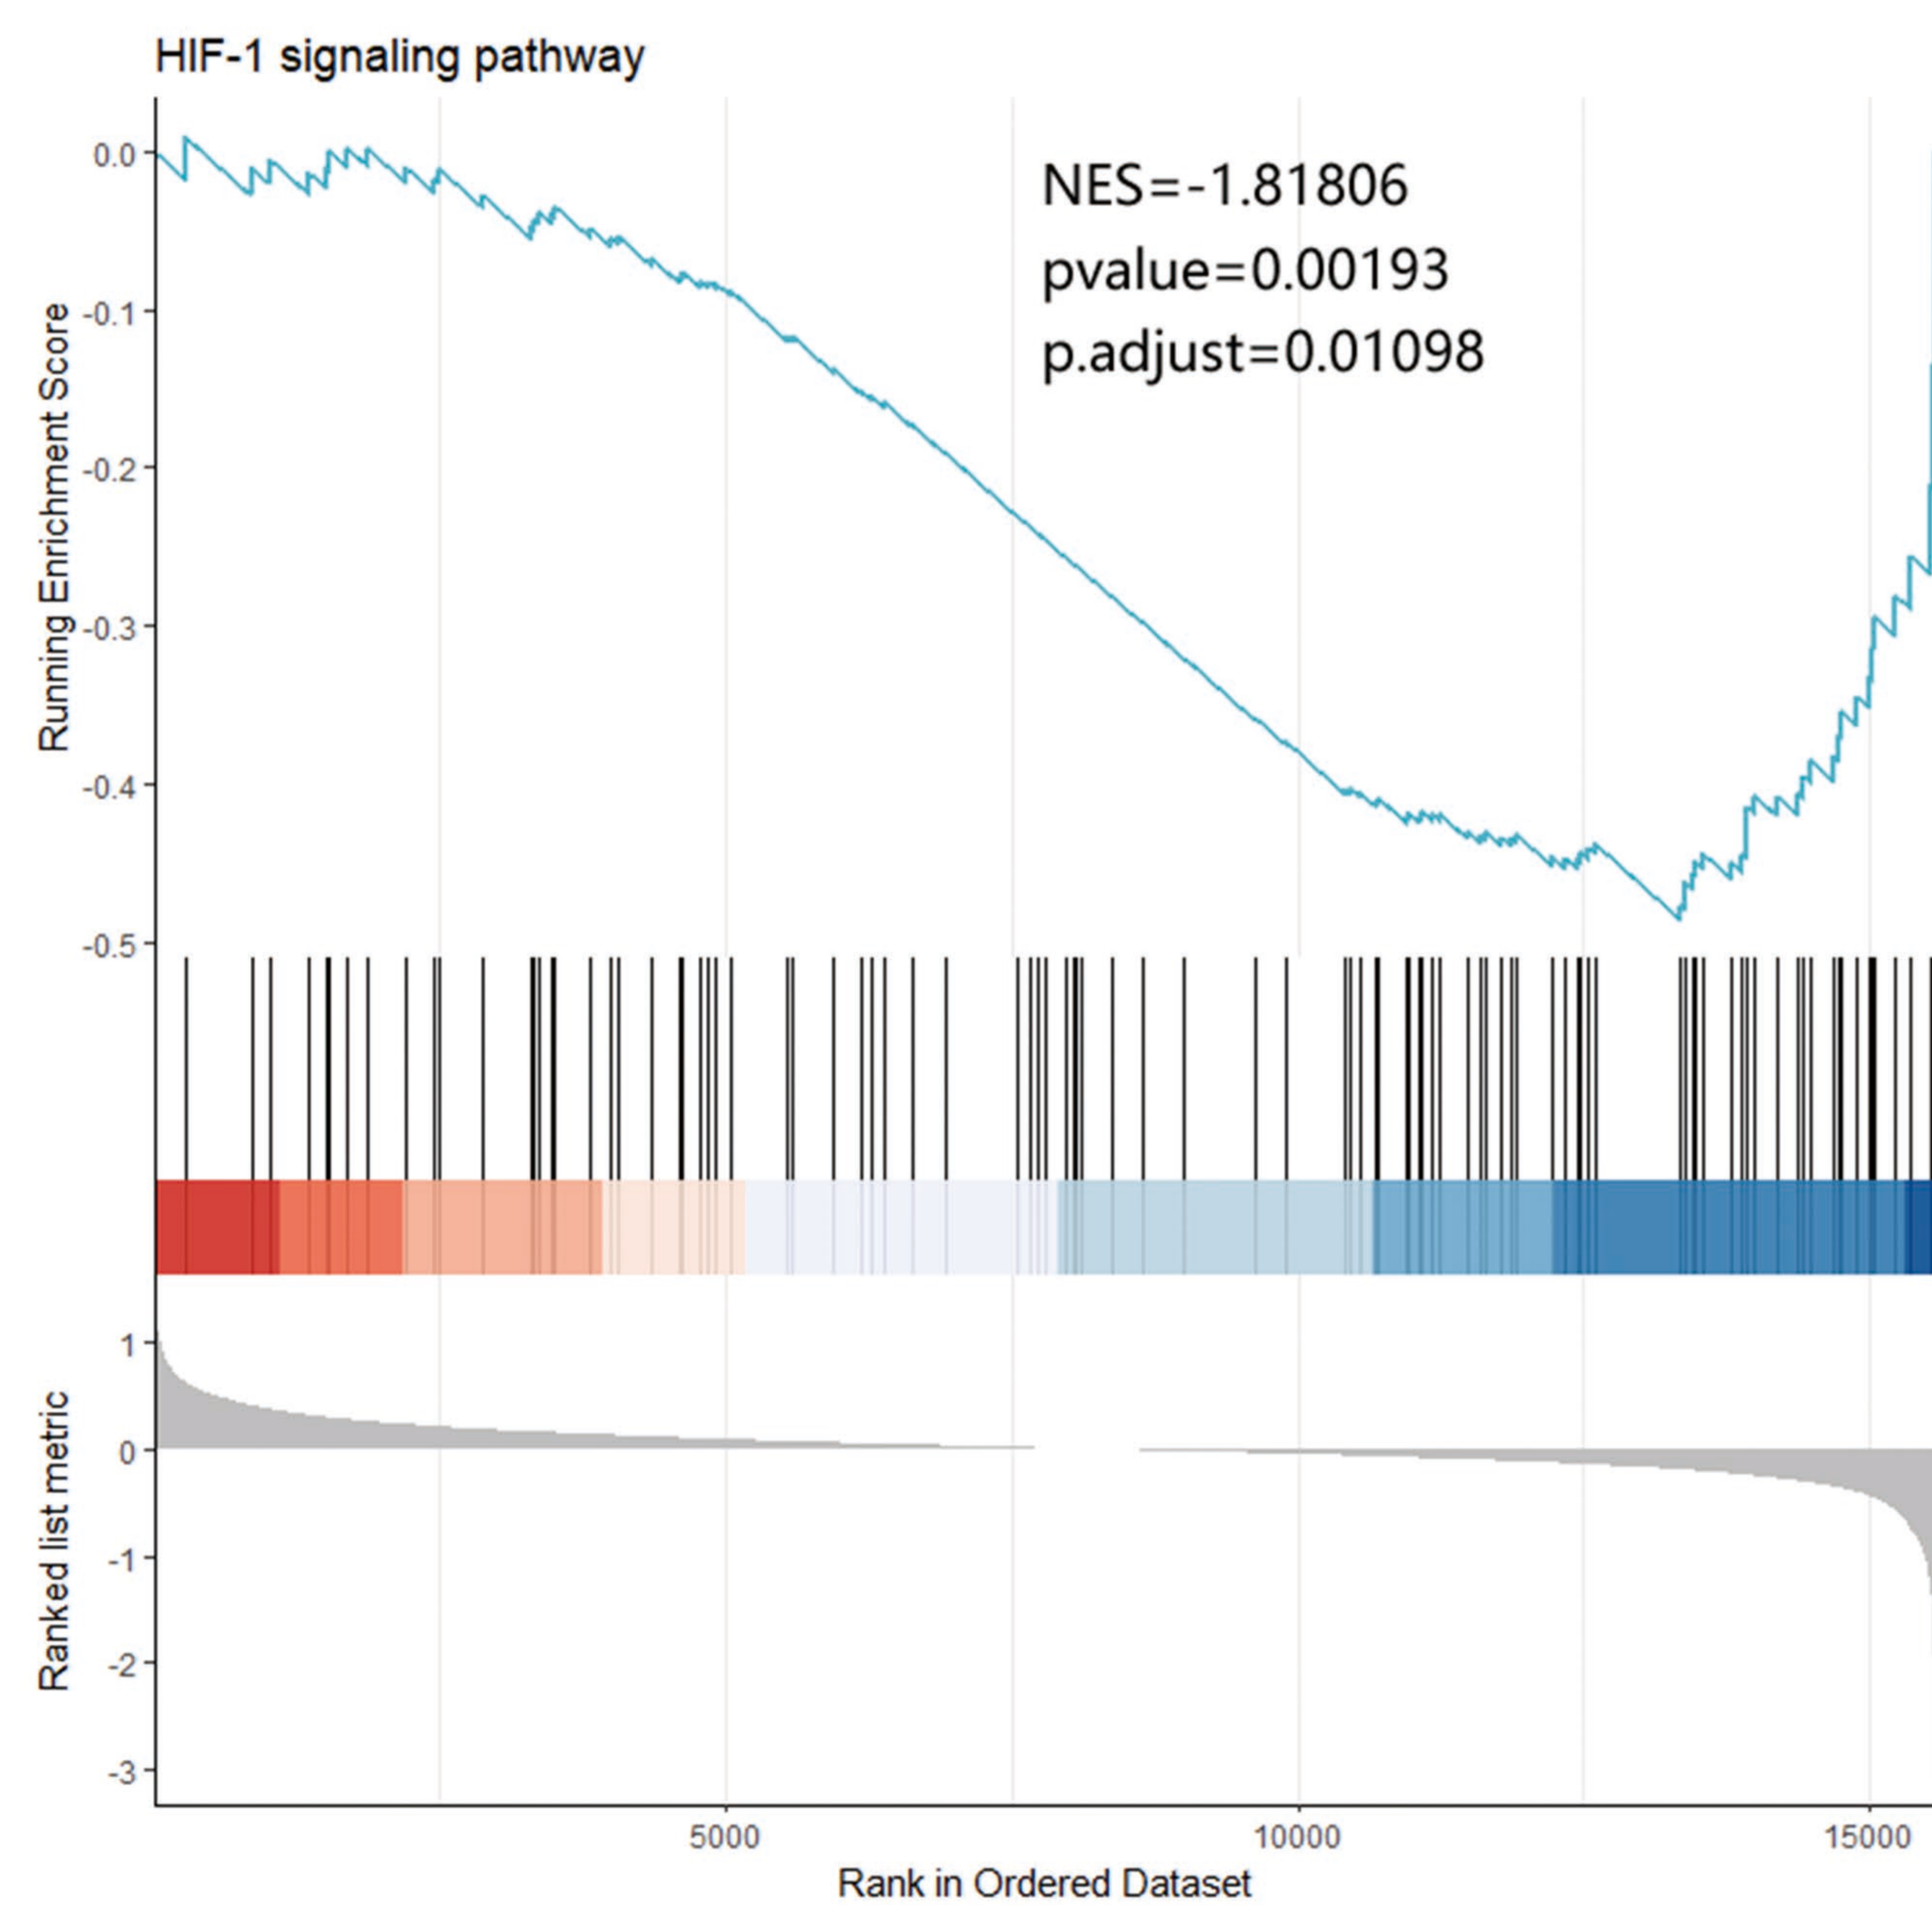

H

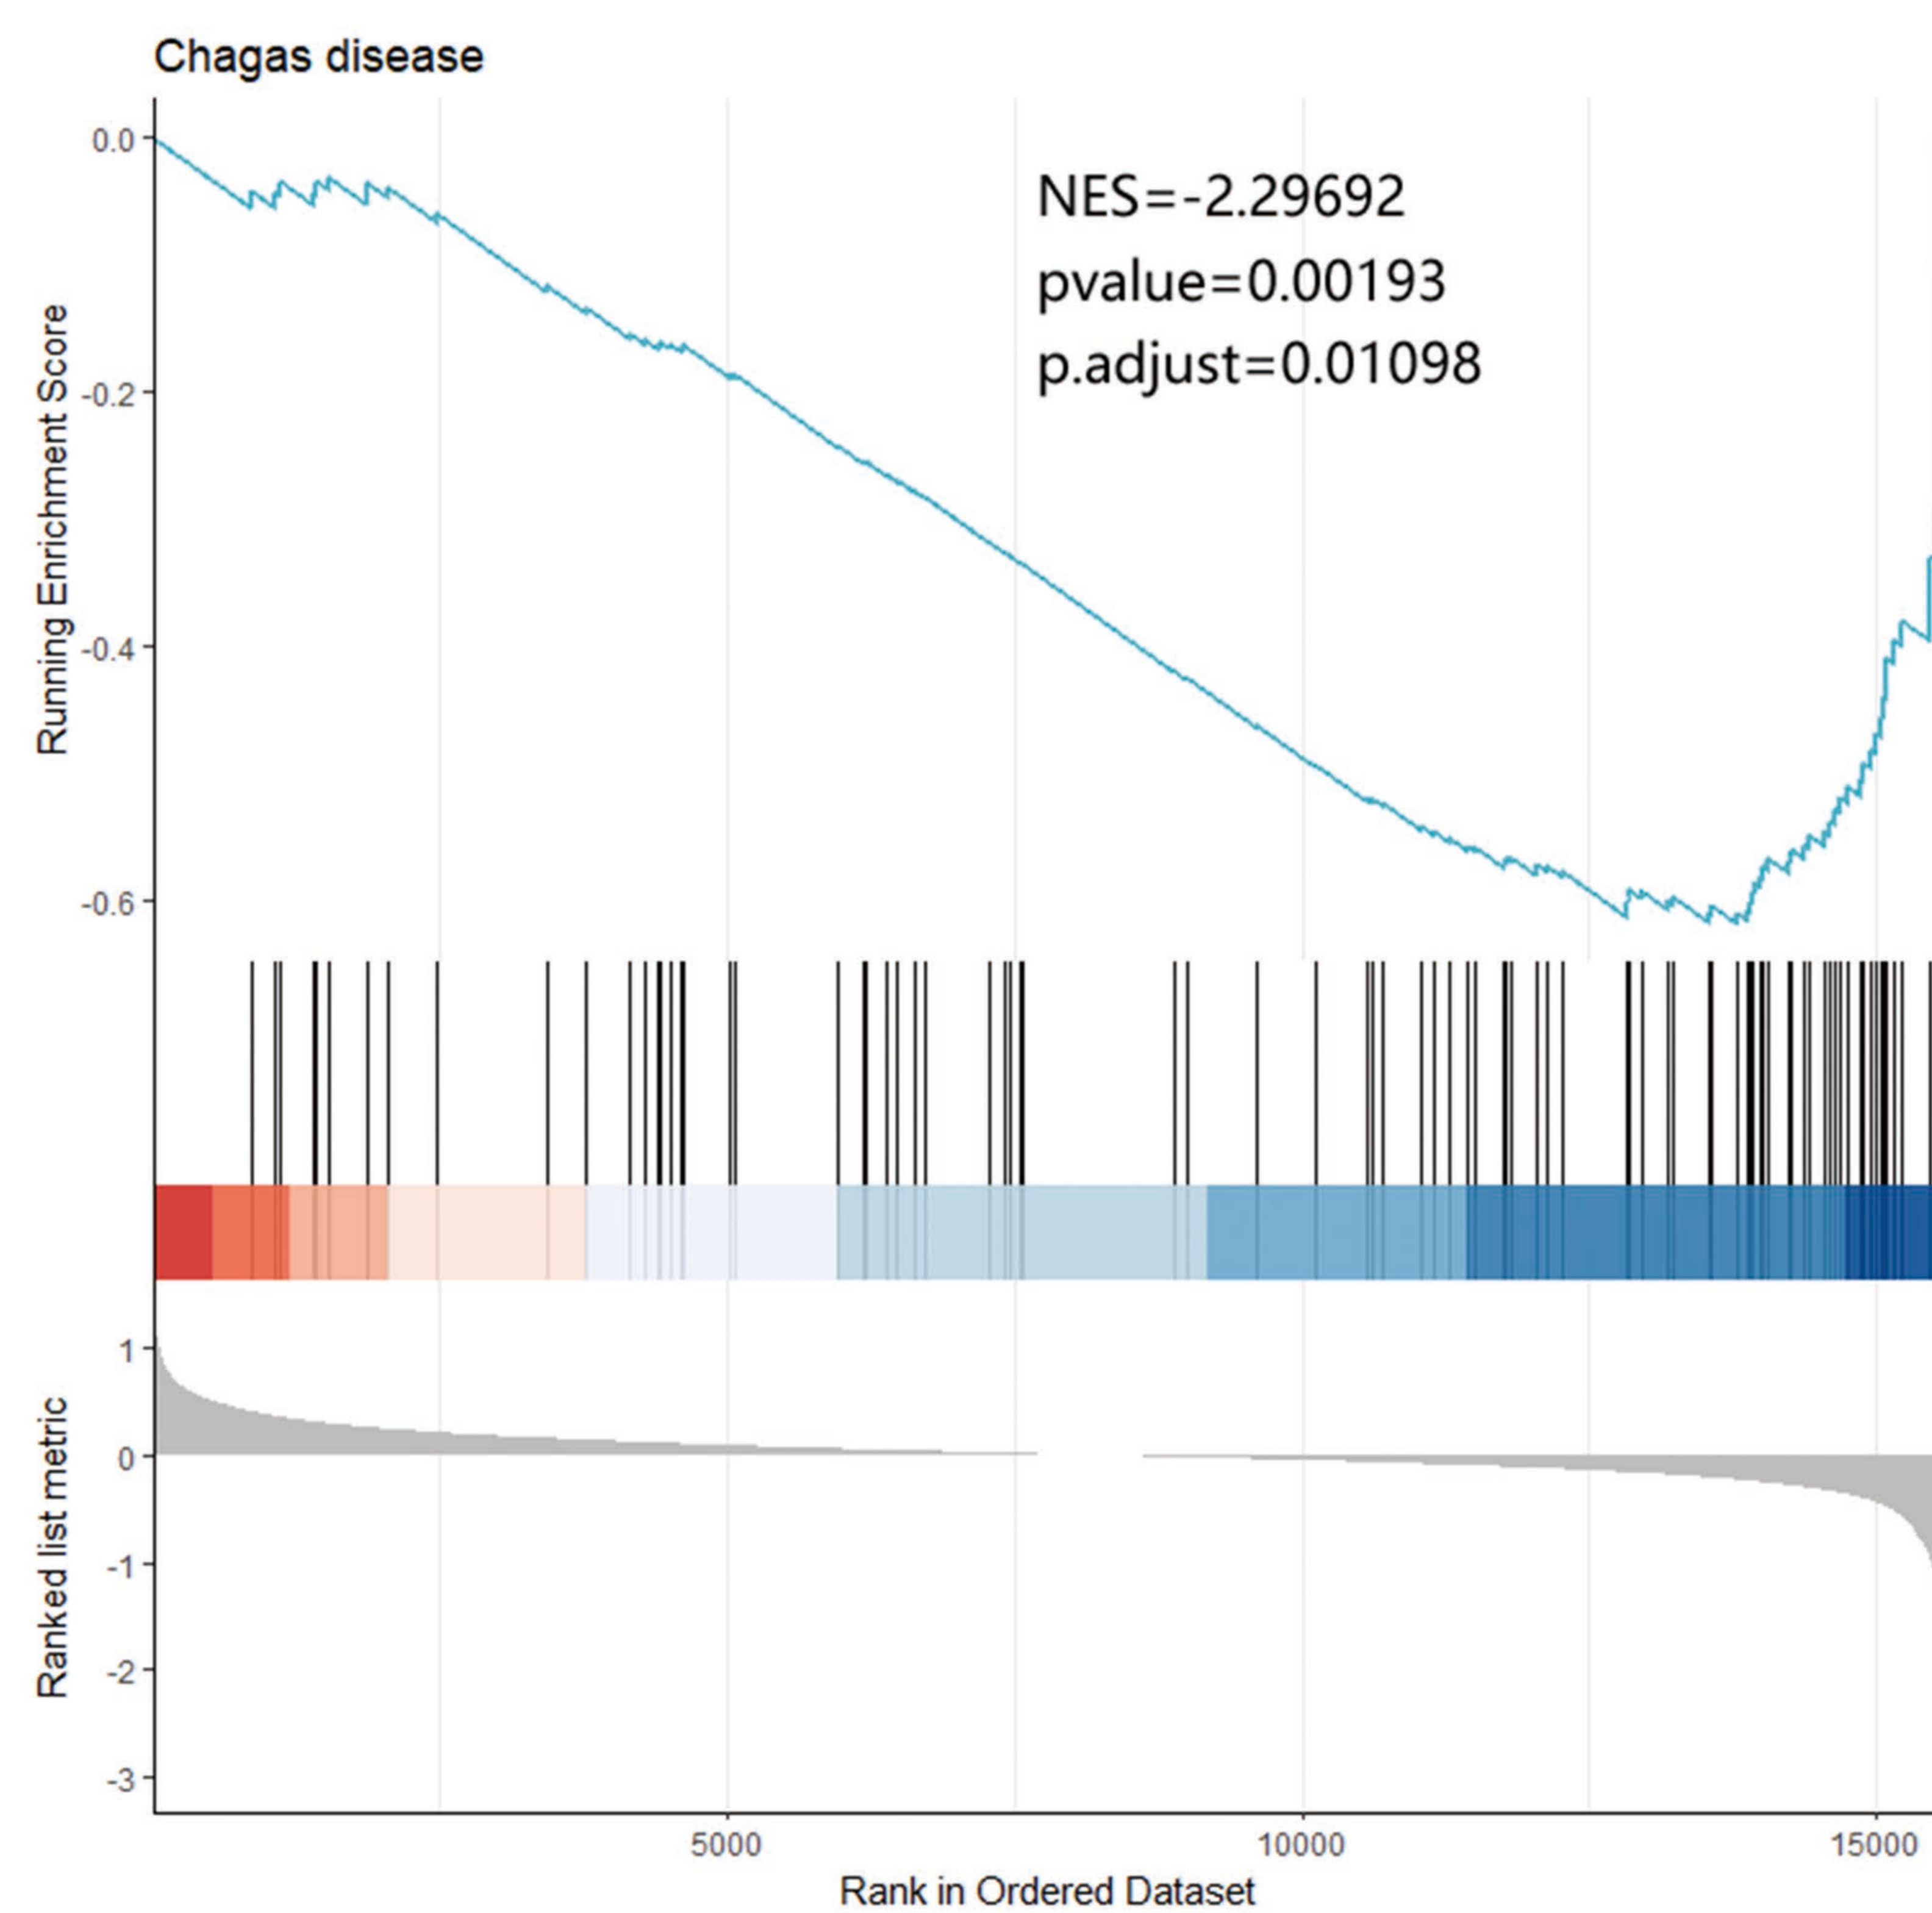

I

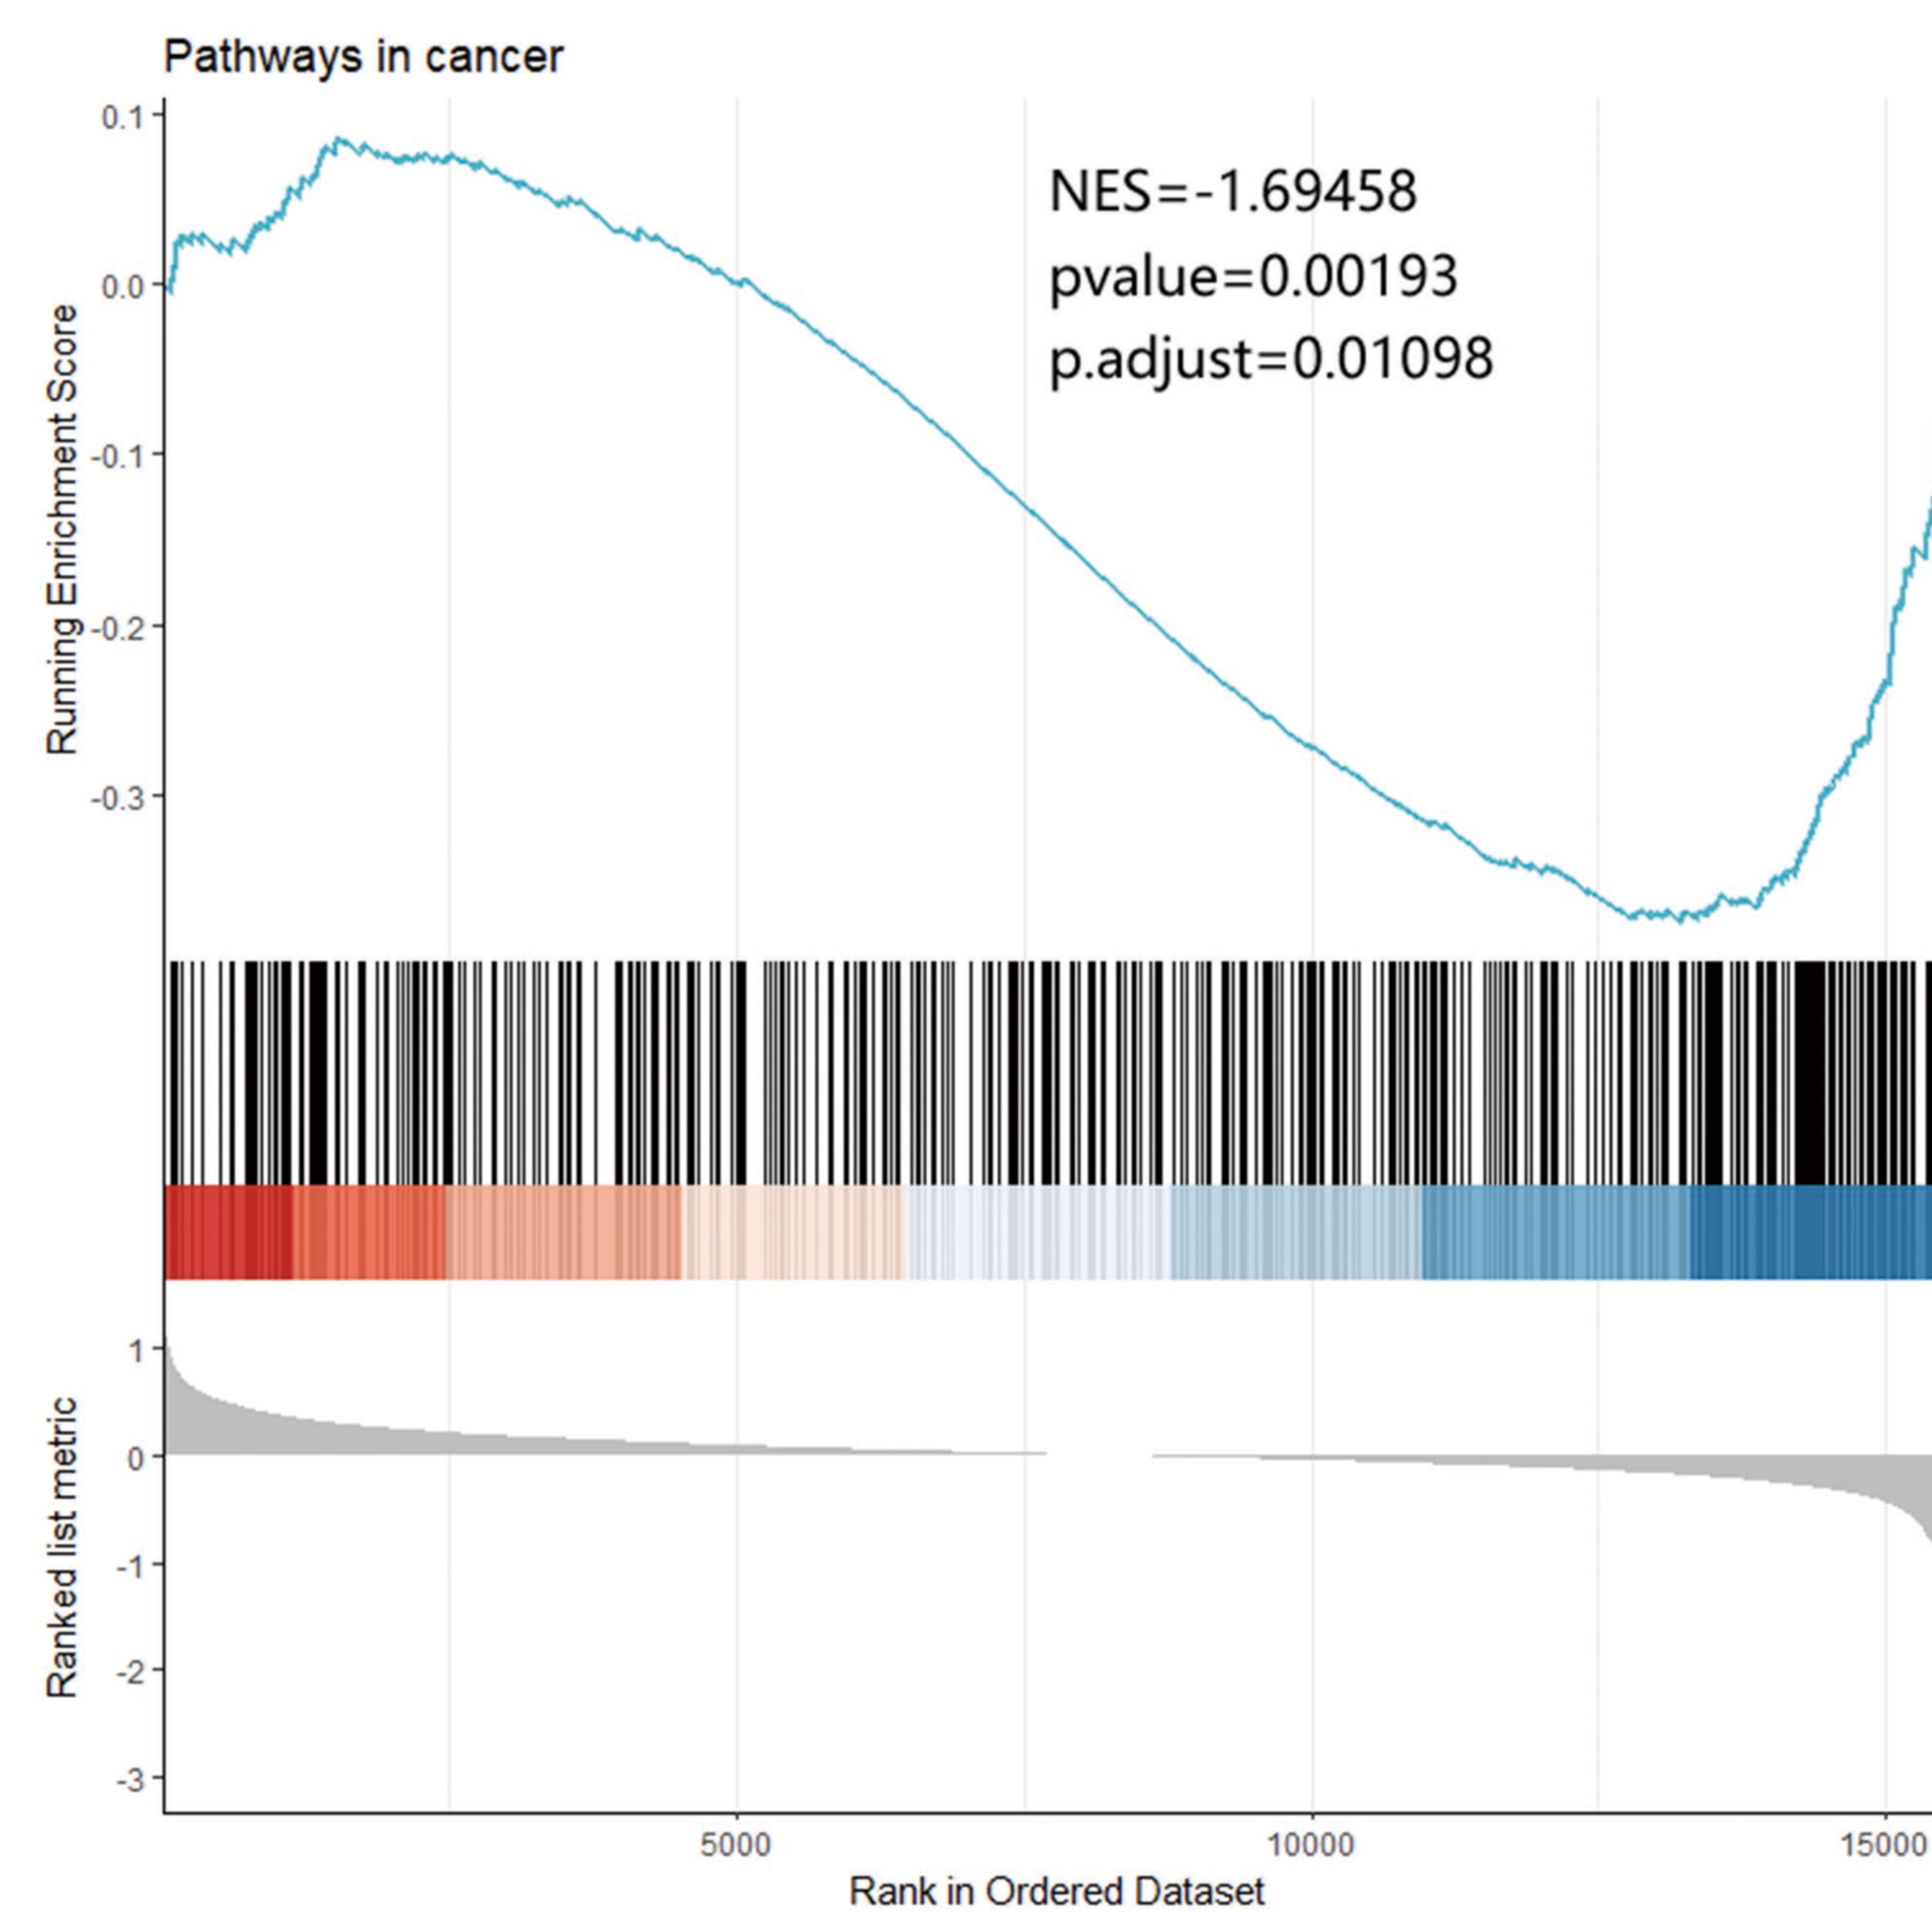

Figure3 GSEA (A) Salmonella infection (B) MAP K signaling pathway (C) Cytokine-cytokine receptor interaction ( D) Human cytomegalovirus infection (E) NF-kappa B signaling pathway (F) PI3K-Akt signaling pathway (G) HIF-1 signaling pathway (H) Chagas disease I. Pathways in cancer GSEA: gene set enrichment analysis; MAPK: mitogen-activated protein kinase; NF- $\kappa$ B: nuclear factor- $\kappa$ B; PI3K-Akt: phosphatidylinositol-3-kinase; HIF: hypoxia-inducible factors
